1 Protein features for assembly of the RNA editing helicase 2 subcomplex (REH2C) in  
2 Trypanosome holo-editosomes

3

4 Vikas Kumar<sup>1#</sup>, Pawan K. Doharey<sup>1#</sup>, Shelly Gulati<sup>2#</sup>, Joshua Meehan<sup>1</sup>, Mary G. Martinez<sup>1</sup>,  
5 Karrisa Hughes<sup>2</sup>, Blaine H.M. Mooers<sup>2\*</sup> and Jorge Cruz-Reyes<sup>1\*</sup>

6

7 <sup>1</sup> Department of Biochemistry and Biophysics, Texas A&M University, College Station, Texas,  
8 United States of America.

9 <sup>2</sup> Department of Biochemistry & Molecular Biology, University of Oklahoma Health Sciences  
10 Center, Oklahoma City, Oklahoma, United States of America.

11

12 \* Corresponding author:

13 e-mail: [cruzrey@tamu.edu](mailto:cruzrey@tamu.edu)

14 \* Correspondence may also be addressed to:

15 e-mail: [blaine-mooers@ouhsc.edu](mailto:blaine-mooers@ouhsc.edu)

16

17 # These authors contributed equally to this work.

18

19

## 20 Abstract

21  
22 Uridylate insertion/deletion RNA editing in *Trypanosoma brucei* is a complex system that  
23 is not found in humans, so there is interest in targeting this system for drug development. This  
24 system uses hundreds of small non-coding guide RNAs (gRNAs) to modify the mitochondrial  
25 mRNA transcriptome. This process occurs in holo-editosomes that assemble several  
26 macromolecular *trans* factors around mRNA: the RNA-free RNA editing core complex (RECC)  
27 and auxiliary RNPs. Yet, the regulatory mechanisms of editing remain obscure. The enzymatic  
28 accessory RNP complex, termed the REH2C, includes mRNA substrates and products, the  
29 multi-domain 240 kDa RNA Editing Helicase 2 (REH2) and an intriguing 8-zinc finger protein  
30 termed REH2-Associated Factor 1 (<sup>H2</sup>F1). Both proteins are essential in editing. REH2 is a  
31 member of the DExH/RHA subfamily of RNA helicases with a conserved C-terminus that  
32 includes a regulatory OB-fold domain. In trypanosomes, <sup>H2</sup>F1 recruits REH2 to the editing  
33 apparatus, and <sup>H2</sup>F1 downregulation causes REH2 fragmentation. Our systematic mutagenesis  
34 dissected determinants in REH2 and <sup>H2</sup>F1 for the assembly of REH2C, the stability of REH2,  
35 and the RNA-mediated association of REH2C with other editing *trans* factors. We identified  
36 functional OB-fold amino acids in eukaryotic DExH/RHA helicases that are conserved in REH2  
37 and impact the assembly and interactions of REH2C. <sup>H2</sup>F1 upregulation stabilized the large  
38 REH2 polypeptide *in vivo*. Mutation of the core cysteines or basic amino acids in individual zinc  
39 fingers affected the stabilizing property of <sup>H2</sup>F1 but not its interactions with other examined  
40 editing components. Thus, most if not all fingers may contribute to REH2 stabilization. Finally, a  
41 recombinant REH2 (240 kDa) established that the full-length protein is a *bona fide* RNA  
42 helicase with ATP-dependent unwinding activity. REH2 is the only DExH/RHA-type helicase in  
43 kinetoplastid holo-editosomes.

44

45

## 46 **Introduction**

47

48 Kinetoplastid protozoa including *Trypanosoma brucei* are early-branching eukaryotes  
49 that require extensive insertion and deletion of uridylates in most mitochondrial mRNAs  
50 (reviewed in 1). This RNA editing is protein-catalyzed and directed by small guide RNAs  
51 (gRNAs) that exhibit complementarity to fully edited mRNA via Watson-Crick and wobble G•U  
52 base pairs. Most editing progresses in blocks that typically overlap and each block is directed by  
53 a single gRNA (2). The editing machinery includes multiple subcomplexes: the ~20S catalytic  
54 RNA editing core complex (RECC, also called the 20S editosome) and auxiliary editing RNPs.  
55 The ~15S REH2-associated complex (REH2C) characterized here includes RNA editing  
56 helicase 2 (REH2), REH2-associated protein factor 1 (<sup>H2</sup>F1), <sup>H2</sup>F2, and mRNA substrates and  
57 products (3, 4). However, only REH2 and <sup>H2</sup>F1 participate in editing. REH2C interacts physically  
58 and functionally with a larger accessory editing RNP complex termed the RNA editing substrate  
59 binding complex (RESC), which also contains mRNA substrates and products (5, 6). The  
60 presence of mRNA in RESC was confirmed by others (7, 8). RESC contains two modules that  
61 are intimately associated with each other: the gRNA-binding complex (GRBC) typified by the  
62 GAP1/GAP2 (alias GRBC2/GRBC1) heterotetramer that binds and stabilizes gRNA, and the  
63 more loosely defined RNA editing mediator complex (REMC) typified by RGG2 (6). REMC  
64 includes proteins that promote editing progression (8-10). Other mRNA *trans* factors include a  
65 subcomplex containing MRB6070 and MRB1590, and RNA helicase REH1 that associate with  
66 holo-editosomes via stable or transient RNA contacts, respectively (11-13). The editing  
67 apparatus is further complicated by the occurrence of variants of GRBC, REMC and RECC  
68 (reviewed in 1). The dynamic nature of the holo-editosome may be relevant in editing control  
69 and is reminiscent of the intricate molecular dynamics of the RNP complexes involved in mRNA  
70 splicing and transcription.

71

72           The finding that the editing RNPs described above carry mRNA and gRNA implied that  
73 mRNA-gRNA hybrids form on multi-RNP platforms, and that transient addition of the RECC  
74 enzyme to the substrate-loaded platforms completes the assembly of the holo-editosome (3-8).  
75 The precise control mechanisms in editing remain unclear. However, the helicase REH2C  
76 subcomplex may play an important regulatory role. REH2 is the largest characterized member  
77 of the DExH/RNA helicase A (RHA) subfamily of proteins (14). These proteins are monomeric  
78 and contain a conserved C-terminal domain cluster that includes the characteristic auxiliary  
79 oligonucleotide-binding (OB fold) domain (3, 14-16). The OB fold in some RNA helicases is  
80 known to bind protein regulators or mediate RNA-dependent activation of these enzymes (17).  
81 DExH/RHA proteins have a N-terminus with a variable domain organization of less clear  
82 function. The N-terminal half of the REH2 carries two predicted double-stranded RNA binding  
83 domains: dsRBD1 and dsRBD2 (14). Other characterized DExH/RHA-type proteins that carry  
84 two N-terminal dsRBDs are the RNA helicase RHA (aka DHX9) in vertebrates and its  
85 orthologous RNA helicase MLE (*maleless*) in flies (18). Recombinant versions of the REH2 N-  
86 terminal half and full-size octa-zinc finger <sup>H2</sup>F1 formed a stable complex *in vitro* (4). However,  
87 <sup>H2</sup>F1 is an unusual binding partner of DExH/RHA proteins that typically associate with G-patch  
88 proteins (17). A genetic knockdown of <sup>H2</sup>F1 prevented RNA-mediated association of REH2 with  
89 other editing components and caused fragmentation of REH2 *in vivo*, so <sup>H2</sup>F1 serves as an  
90 adaptor protein and may stabilize REH2 (4).

91           The current study identified features in REH2 and <sup>H2</sup>F1 that affect the binding of these  
92 proteins with each other, the stability of REH2, and RNA-mediated stable or transient  
93 association of the REH2C subcomplex with other editing components *in vivo*. About 20 different  
94 protein variants were examined *in vivo*. Comparisons of the REH2 with other eukaryotic  
95 DExH/RHA helicases identified conserved OB fold residues that affect the assembly and

96 interactions of REH2C and are also important in distant processes, namely mRNA splicing in  
97 yeast, and the assembly of the dosage compensation complex in fly. <sup>H2</sup>F1 upregulation  
98 stabilized the large REH2 polypeptide *in vivo*. However, mutation of individual zinc fingers  
99 compromised the stabilizing property of <sup>H2</sup>F1 but not its association with REH2 or other  
100 examined components of the editing apparatus. Thus, most if not all fingers may contribute to  
101 REH2 stabilization. Finally, we used a recombinant protein construct to establish that the  
102 isolated full-length REH2 (240 kDa) is a *bona fide* RNA helicase enzyme with ATP-dependent  
103 unwinding activity. REH2C is most likely an enzymatic editing RNP in kinetoplastid holo-  
104 editosomes.

105

## 106 **Results**

107

108 Previous studies revealed that the native REH2C exhibits RNA-mediated interactions  
109 with at least two variants of RESC (3-5). These variants contain gRNA and comparable levels of  
110 GAP1 and RGG2, that typify GRBC and REMC, respectively. However, these variants differ  
111 minimally in their relative content of the canonical MRB3010 in GRBC. Additional variations in  
112 protein composition have been reported in purifications of RESC components by different labs  
113 (reviewed in 1). Interestingly, native and genetically-induced changes in MRB3010 stoichiometry  
114 may be common. While the precise reasons of these changes are unclear, we reasoned that  
115 they reflect relevant dynamic changes in the assembly and function of the editing apparatus. In  
116 this study, we examined protein features that affect the formation of REH2C, its stable  
117 association with RESC components, and transient contacts with the RECC enzyme. Because  
118 the examined helicase-associated RESC variant exhibits substoichiometric MRB3010, we refer  
119 to its variant GRBC module as GRBC\* (4). We have detected other proteins in this RESC

120 variant using antibodies made available to us, including: MRB8170 and MRB6070 (data not  
121 shown). However, further analysis of relative composition between variants is needed.

122

### 123 **Analysis of REH2 mutants *in vivo***

124

125 We analyzed the importance of specific features of REH2, both in the formation of REH2C  
126 and in the association of this subcomplex with other components in holo-editosomes (constructs  
127 listed in Fig. 1A). To this end, we expressed a tetracycline-inducible tagged REH2 wild-type (WT)  
128 construct and examined its co-purification with endogenous <sup>H2</sup>F1 and GAP1 proteins, in the REH2C  
129 and GRBC, respectively. We found that ectopic REH2 was able to reconstitute interactions of the  
130 native REH2 protein in trypanosomes (Fig. 1B-C, lanes 1-2, respectively). With this system in hand,  
131 we began testing the assembly of REH2 variants bearing truncations or point mutations in an  
132 approach that has been used in other eukaryotic DExH/RHA helicases (16, 19). Neither  
133 overexpression or depletion of REH2 affects the steady-state level of its binding partner <sup>H2</sup>F1 or  
134 the examined GRBC proteins (3, 4).

135

136 **Fig. 1. *In vivo* analyses of REH2 variants. (A)** Scheme of REH2 WT (2167 residues) and  
137 variants with the examined truncations or point mutations in the N- and C-terminal regions (NTR  
138 and CTR). The mutations, affected domains, and predicted molecular weight of the constructs  
139 are listed. Identified domains: dsRBD1 and dsRBD2 (double-stranded RNA binding domains 1  
140 and 2), CORE (catalytic core RecA1 and RecA2 domains), HA2 (helicase associated helical  
141 bundle domain), and OB (OB fold-like domain). **(B-C)** Western blots of IgG pulldowns from  
142 extracts to examine the association of tagged REH2 WT or deletion mutants with endogenous  
143 <sup>H2</sup>F1 and GAP1. An uninduced (-Tet) control lane is included. The GAP1 panels derive from  
144 equivalent pulldowns with the same recovery of tagged protein (data not shown). The data are  
145 representative of at least three biological replicates for each mutant. A few non-specific species

146 cross-react with the antibodies in some assays. The position of IgG is marked. Sizing markers  
147 (M) are in kDa. **(D)** Charts of the relative level of  $^3\text{H}$ F1 and GAP1 in the pulldowns.  
148 Representative assays from panels A-B and other pulldowns in this study were used to plot +/-1  
149 SD,  $n=3$  for each mutant. The  $^3\text{H}$ F1/REH2 and GAP1/REH2 ratios in each REH2 mutant were  
150 normalized to the ratios in REH2 WT (= 1, in the plot). Assays with signals that too low were not  
151 measured (not determined, n.d.). REH2 was often fragmented, so only the full-length  
152 polypeptide was scored. Some short variants were present at higher level than REH2 WT in the  
153 induced extracts.

154  
155 *N- and C-truncations.* We examined N- and C-terminal regions (NTR and CTR) flanking the  
156 catalytic and helicase associated domains RecA1/RecA2 and HA2, respectively, in REH2. We  
157 removed sequences in the unique NTR (>1000 residues) in the REH2 variants  $\Delta\text{N}$  and  $\Delta\text{Nds}$ , or in  
158 the CTR after the OB fold (123 residues) or from the OB fold (260 residues) in the  $\Delta\text{AOB}$  and  $\Delta\text{OB}$   
159 variants, respectively. REH2 and its orthologs in kinetoplastids are the largest known DExH/RHA-  
160 type helicases and carry the longest helicase-specific N terminus (~1300 residues in REH2 from *T.*  
161 *brucei*) (14). Direct comparisons with the REH2 WT construct showed that the examined N- and C-  
162 resections reduced the association of the shortened REH2 polypeptides with  $^3\text{H}$ F1 and GAP1 proteins  
163 (Figs. 1B-D). This suggested that both termini of REH2 may contribute to the normal assembly of  
164 REH2C and its RNA-mediated interactions with other editing components *in vivo*. Motifs in the  
165 dsRBDs, the OB fold, and undefined features in the N and C termini may be involved. It is also  
166 conceivable that the examined sequence resections impact the global conformation of REH2, thereby  
167 indirectly affecting its protein interactions. Thus, the normal REH2 interactions in the editing  
168 apparatus may be sensitive to overall changes in the integrity or conformation of REH2. Because the  
169 CTR includes a potentially regulatory OB fold in DExH/RHA-type RNA helicases (16), we focused on  
170 this domain in the subsequent studies of REH2.

171  
172 *Point mutations.* Our structural searches of the OB fold-like domain in REH2 using Phyre2  
173 (20) found the best agreements with reported structures of yeast ADP-bound Prp43p helicase and  
174 *Drosophila* RNA helicase MLE RNA ADP Alf4 complex (4, 16, 18)(and data not shown). Prp43p is a  
175 bi-functional helicase in mRNA splicing and ribosome biogenesis (15, 21). The helicase MLE  
176 remodels roX RNA substrates to promote assembly of the dosage compensation complex in  
177 *Drosophila* (18). We examined specific residues in the predicted OB fold of REH2 that seem to be  
178 conserved in reported DExH/RHA helicase structures (Fig. 2 A-D). OB point mutations were  
179 compared to two controls: REH2 WT and a reported mutation in dsRBD2 (dsR) that reduces the  
180 association of REH2 with GAP1, gRNA and mRNA (Fig. 2A, lanes 1 and 2, respectively) (3). The  
181  $\beta 1$ - $\beta 2$  and  $\beta 4$ - $\beta 5$  loops in the OB fold may include determinants in nucleic acid recognition (Fig. 2D)  
182 (16, 18). In helicase Prp43p, mutation of R664 or K704, which are exposed in the Prp43p structure,  
183 decreased the RNA affinity and ATPase activity of the helicase *in vitro* (16). Sequence alignments  
184 and a homology model using Prp43p as the template matched R664 and K704 in Prp43p with R1979  
185 and R2023 in REH2, respectively (data not shown). Pulldowns of the R1979A and R2023A mutants  
186 suggest that neither mutation alters the association of REH2 with  $^{\text{H}2}\text{F1}$  (Figs. 2A-C; and data not  
187 shown). R1979A did not appear to affect the REH2 association with GAP1. However, R2023A  
188 caused a moderate decrease in the association with GAP1, implying that at least R2023A could be  
189 disruptive in trypanosomes. In helicase MLE, a few identified residues in the OB fold bind specific  
190 uridylates in U-rich sequences in roX transcripts, and mutation of some of these residues impaired  
191 RNA binding by MLE *in vitro* or the proper localization of MLE in chromosomes (18). Sequence  
192 alignments and homology models indicated that the residues H1032 and K1033 in MLE likely  
193 represent residues H1998 and R1999 in the  $\beta 3$ - $\beta 4$  loop in the OB fold in REH2 (Fig. 2D; S1 Fig; and  
194 data not shown). The H1998E mutant appeared to retain a normal association with  $^{\text{H}2}\text{F1}$  but exhibited  
195 a moderate decrease in association with GAP1. In contrast, R1999E either alone or together with



196 H1998E (98/99) exhibited a more robust decrease (over 60%) in association with both  $^{\text{H}2}\text{F1}$  and  
197 GAP1 (Fig. 2A-C). This indicated that H1998 and R1999 contribute to the assembly of the REH2  
198 helicase with other editing components. However, R1999 has a higher impact on such interactions  
199 than the adjoining H1998. As expected, the dsR mutant used as a control exhibited a strong  
200 decrease in association with GAP1. However, the dsR mutation did not seem to affect the  
201 association of REH2 with  $^{\text{H}2}\text{F1}$  (Figs. 2A, 2C). Pulldowns of the mutants were normalized to the  
202 REH2 WT control.

203  
204 **Fig. 2. *In vivo* analyses of REH2 variants. (A)** Western blots of IgG pulldowns as in Fig. 1 to  
205 examine the association of endogenous  $^{\text{H}2}\text{F1}$  and GAP1 with tagged REH2 WT or variants with  
206 point mutations in the OB fold domain: single at R1979A (1979), H1998E (1998) and R1999E  
207 (1999), or double at 1998/1999 (98/99). The previously characterized dsR mutant with an  
208 inactivating double mutation in the dsRBD2 was included for comparison (3). The GAP1 panels  
209 in Figs. 2A-B derived from identical pulldowns with the same recovery of tagged protein (data  
210 not shown). A few non-specific species crossreact with the antibodies in some assays. **(C)**  
211 Charts of the relative levels of  $^{\text{H}2}\text{F1}$  and GAP1 in the pulldowns. Assays from panels A-B and  
212 biological replicate pulldowns in this study were used to plot  $\pm 1$  SD,  $n=2$  or  $n=3$  for each  
213 mutant. The  $^{\text{H}2}\text{F1}/\text{REH2}$  and  $\text{GAP1}/\text{REH2}$  ratios in each REH2 mutant were normalized to the  
214 ratios in REH2 WT (= 1, in the plot). **(D)** Secondary structure prediction of the OB fold with  $\alpha$ -  
215 helix (cylinders) and  $\beta$ -strand (arrows) elements, and the position of point mutations examined  
216 indicated by arrows.

217  
218 Together, our systematic mutagenesis of REH2 suggests an intricate interaction network  
219 including features across both N- and C- terminal regions of REH2 that affect the assembly of  
220 REH2C, and the association of this subcomplex with other components of the editing apparatus *in*

221 *in vivo*. Remarkably, these observations also indicate that equivalent residues in the auxiliary  
 222 conserved OB fold domain in DExH/RHA helicases function in disparate RNA processes in  
 223 taxonomically distant species of trypanosomes, yeast, and fly. While large protein truncations in  
 224 REH2 may alter the global conformation of the polypeptide, relevant point mutations in REH2 are  
 225 more likely to cause specific functional effects. Table 1 summarizes observed effects of the examined  
 226 mutations in REH2 on its association with <sup>H2</sup>F1 and GAP1.

227 **Table 1. Association of REH2 constructs with <sup>H2</sup>F1 and GAP1**

| REH2-TAP variant | Association in pulldown |              | Reference             |
|------------------|-------------------------|--------------|-----------------------|
|                  | <sup>H2</sup> F1        | GAP1         | Construct described   |
| WT               | control*                | control*     | Hernandez et al. 2010 |
| ΔN               | decreased               | decreased    | This study            |
| ΔNds             | decreased               | decreased    | This study            |
| ΔOB              | decreased               | decreased    | This study            |
| ΔAOB             | decreased               | decreased    | This study            |
| dsR              | control-like †          | decreased    | Madina et al. 2016    |
| 1979             | control-like            | control-like | This study            |
| 1998             | control-like            | decreased    | This study            |
| 1999             | decreased               | decreased    | This study            |
| 98/99            | decreased               | decreased    | This study            |
| 2023             | control-like            | decreased    | This study            |

\* The WT construct served as positive control to assess relative association of mutant constructs.

† Comparable to the level observed with the WT construct.

228  
229

## 230 Analysis of <sup>H2</sup>F1 mutants *in vivo*

231 To analyze specific features of the <sup>H2</sup>F1 zinc finger protein in trypanosomes, we expressed a  
 232 tagged <sup>H2</sup>F1 WT construct and examined its association with endogenous REH2, GAP1 and REL1  
 233 proteins. We found that the tagged <sup>H2</sup>F1 WT was able to reconstitute interactions of the native <sup>H2</sup>F1  
 234 protein in trypanosomes (Fig. 3). Notably, expression of the ectopic <sup>H2</sup>F1 WT increased the steady-  
 235 state level of endogenous REH2 compared to a control lane without tetracycline (Fig. 3A, lanes 1-2;  
 236 Fig. 3B). As a control to mark the position of REH2 we used a reported RNAi-based knockdown of  
 237 <sup>H2</sup>F1 that decreases the level of endogenous REH2 (Fig. 3A, lanes 5-7; Fig. 3B)(4). The contrasting  
 238 effects of the upregulation and downregulation of <sup>H2</sup>F1 on the endogenous REH2 are consistent with  
 239

240 the idea that  $H^2F1$  stabilizes REH2 *in vivo*. These effects by  $H^2F1$  also imply that the interaction  
241 between REH2 and  $H^2F1$  may vary *in vivo* or that these proteins are not always associated. We  
242 examined canonical proteins in REH2C, RESC and RECC in sedimentation analyses of  
243 mitochondrial extract (S2 Fig). REH2 is heterodispersed as shown before (22) and overlaps with  $H^2F1$   
244 in the gradient. However, the relative abundance of these proteins at low and high densities differs  
245 substantially. It is indeed possible that the association between REH2 and  $H^2F1$  or their stoichiometry  
246 in REH2C varies *in vivo*. Additional studies will be necessary to examine these possibilities.

247

248 **Fig 3. Effect of expressing  $H^2F1$  WT or a variant lacking Znf5 (core residues C2>A2) on**  
249 **the REH2 steady state. (A)** Western blots of extracts with tagged  $H^2F1$  WT (lanes 1-2) or Znf5  
250 mutant (Z5; lanes 3-4). Control assays include lanes without Tet-induction. Also, control lanes  
251 with a reported  $H^2F1$ -RNAi construct mark the position of the endogenous REH2 and  $H^2F1$ . The  
252 RNAi lanes show the induced decrease of  $H^2F1$  and concurrent fragmentation of REH2 full-  
253 length (4). The level of endogenous REH2 was examined. GAP1 was used as a loading control  
254 in all assays in this panel. Molecular size markers (M). A typical C2H2 zinc finger domain fold is  
255 depicted with core cysteine substitutions C2>A2 (arrows), other conserved residues, and  
256 variable residues (black circles). **(B)** Charts of the relative levels of endogenous REH2 full-  
257 length in the extracts +/-1 SD,  $n=3$ . Induced/uninduced ratios of REH2 for each construct were  
258 further normalized to GAP1. **(C-D)** IgG pulldowns of WT and Z5 constructs showing association  
259 with endogenous REH2, GAP1, REL1, and endogenous  $H^2F1$ . Non-specific species (\*) may  
260 represent fragments of the tagged protein that react with the antibodies. **(E)** Charts of the  
261 relative levels of REH2, GAP1 and REL1 in the pulldowns +/-1 SD,  $n=3$ . The ratios  
262 (protein/tagged-bait) in the Z5 mutant were normalized to ratios in the  $H^2F1$  WT construct.

263

264 To determine if the stabilizing effect of  $H^2F1$  requires one or more zinc finger (Znf) domains,  
265 we introduced amino acid substitutions that either disrupt the canonical fold of the domain (by

266 replacing the canonical residues) or eliminate the positive charge (by replacing various basic  
 267 residues with neutral residues) in individual fingers of the ectopic construct. The examined <sup>H2</sup>F1  
 268 mutants are summarized in Table 2.

269 **Table 2. <sup>H2</sup>F1 mutants with reduced ability to stabilize REH2 *in vivo***

| <sup>H2</sup> F1-TAP variant  | Endogenous REH2<br><i>Steady-state level</i> | Reference<br>Construct described |
|-------------------------------|----------------------------------------------|----------------------------------|
| WT                            | Increased*                                   | This study                       |
| ZnF1 +>A                      | no change <sup>†</sup>                       | This study                       |
| ZnF2 +>A                      | no change                                    | This study                       |
| ZnF3 +>A                      | no change                                    | This study                       |
| ZnF4 +>A                      | no change                                    | This study                       |
| ZnF5 +>A                      | no change                                    | This study                       |
| ZnF5 C2>A2                    | no change                                    | This study                       |
| ZnF1-8 C2>A2 <sup>&amp;</sup> | no change                                    | This study                       |
| ZnF6-8 C2>A2 <sup>&amp;</sup> | no change                                    | This study                       |
| ZnF1-4 C2>A2 <sup>&amp;</sup> | no change                                    | This study                       |
| ΔN                            | no change                                    | This study                       |
| ΔC                            | no change                                    | This study                       |

\* <sup>H2</sup>F1-WT ectopic expression increased the level of endogenous REH2

† No change (i.e., level within standard deviation of at least two biological replicates)

& Not shown. Ectopic expression was unstable or eventually lost in culture.

270

271

272 *Canonical cysteine residues.* We changed two cysteines to two alanines (C2>A2) to disrupt

273 the native conformation of the predicted zinc fingers (Fig. 3A). We began by disrupting Znf5 because

274 of its significant homology to a reported dsRNA-bound C2H2 zinc finger domain structure (4, 14, 23).

275 The resulting mutant protein (<sup>H2</sup>F1 minus Znf5) did not induce an evident increase in the steady-state

276 level of endogenous REH2 as the WT <sup>H2</sup>F1. This was evident in direct comparisons of extracts that

277 contain similar levels of ectopic <sup>H2</sup>F1 protein, WT or Znf5-less (Fig. 3A, lanes 1-4; Fig. 3B). This

278 differential effect between the <sup>H2</sup>F1 WT and Znf5-less variants was similarly observed in cultures 1 or

279 3 days after induction (data not shown). So, the stabilizing property of <sup>H2</sup>F1 is independent of the

280 period of induction *in vivo*. To examine whether the lack of Znf5 affected the association of <sup>H2</sup>F1 with

281 other editing components, we performed IgG pulldown assays of tagged <sup>H2</sup>F1. These assays showed

282 that the <sup>H2</sup>F1 WT and Znf5-less variants similarly associated with endogenous helicase REH2, GAP1

283 and REL1 ligase (Figs. 3C, 3E). Notably, pulldowns of both tagged  $^{\text{H}2}\text{F1}$  WT and Znf5-less, contain  
284 endogenous  $^{\text{H}2}\text{F1}$  (Fig. 3D). Thus, Znf5 is not essential for the normal association of  $^{\text{H}2}\text{F1}$  with other  
285 editing components.

286 We also tested a  $^{\text{H}2}\text{F1}$  variant bearing a triple C2>A2 substitution in Znf6, Znf7 and Znf8. The  
287  $^{\text{H}2}\text{F1}$  triple mutant failed to stabilize endogenous REH2 but it was able to bind REH2 and GAP1 as  
288 we observed with both  $^{\text{H}2}\text{F1}$  WT and Znf5-less constructs (data not shown). Expression of this  
289 construct was unstable and eventually lost in culture (data not shown). These observations suggest  
290 that  $^{\text{H}2}\text{F1}$  may require a full complement of zinc fingers in their native conformation to stabilize REH2  
291 but not to associate with the examined editing components.

292  
293 *Variable basic residues.* Because the native conformation of the zinc fingers seems to be  
294 required for  $^{\text{H}2}\text{F1}$  to stabilize REH2 we introduced mutations to decrease the positive charge in the  
295 zinc fingers. Yet these mutated fingers are likely to retain their native conformation (24). We  
296 expressed  $^{\text{H}2}\text{F1}$  variants to test the role of several basic residues around the core residues that are  
297 mostly located between the second cysteine and the first histidine (Fig. 4A) (25). Specifically, we  
298 introduced R/K>A substitutions to decrease the positive charge in the zinc fingers and to remove  
299 potential charge-charge interactions with REH2 or associated RNAs. Our functional analyses of Znf1,  
300 Znf2, Znf3 or Znf5 showed that the loss of positive charge in any of these zinc fingers reduced the  
301 ability of  $^{\text{H}2}\text{F1}$  to induce the accumulation of intact endogenous REH2 in extracts (Figs. 4B-C).  
302 However, these mutations did not prevent the association of  $^{\text{H}2}\text{F1}$  with REH2, GAP1 and REL1 (Figs.  
303 4D, 4F). These expressed  $^{\text{H}2}\text{F1}$  variants also co-purified with endogenous  $^{\text{H}2}\text{F1}$  at a level comparable  
304 to the WT construct (Figs. 4D-F). So, the wildtype and R/K>A variant proteins associated similarly  
305 with the examined editing components. Overall,  $^{\text{H}2}\text{F1}$  may require that most zinc fingers retain their  
306 native conformation and positive charge to efficiently increase the stability of REH2. However, the  
307 loss of the native conformation or positive charge in individual fingers does not preclude the  
308 assembly of  $^{\text{H}2}\text{F1}$  in the REH2C, or the association of this subcomplex with the examined editing

309 components. Detection of endogenous  $^{\text{H}2}\text{F1}$  in our pulldowns suggest the presence of  $^{\text{H}2}\text{F1}$   
310 multimers. Pulldowns treated with an RNaseA/T1 mixture suggest that the association between  
311 tagged  $^{\text{H}2}\text{F1}$  and endogenous  $^{\text{H}2}\text{F1}$  is RNase-resistant (S3 Fig.). However, further studies using  
312 isolated recombinant proteins are needed to establish direct protein contacts between  $^{\text{H}2}\text{F1}$   
313 monomers as it was shown between REH2 and  $^{\text{H}2}\text{F1}$  (4).

314

315 **Fig. 4. *In vivo* analyses of  $^{\text{H}2}\text{F1}$  variants with reduced positive charge in Znf1, Znf2, Znf3**

316 **or Znf5 (variable residues R/K>A). (A)** Cartoon of  $^{\text{H}2}\text{F1}$  (524 residues). Multi-sequence  
317 alignment of the eight C2H2 zinc fingers, indicating the core cysteines and histidines (boxes)  
318 and variable basic residues in each finger (open circles). Depiction of a C2H2 zinc finger  
319 domain fold, and variable residue substitutions R/K>A. **(B)** Extracts as in Fig. 3A of induced  
320 tagged  $^{\text{H}2}\text{F1}$  WT and Z1, Z2, Z3 and Z5 mutants or uninduced control. GAP1 was used as a  
321 loading control (lanes 1-7). **(C)** Chart of steady-state level of endogenous REH2 full-length in  
322 extracts with each construct as in Fig. 3B. **(D-E)** IgG pulldowns of  $^{\text{H}2}\text{F1}$  WT and Z1, Z2, Z3 and  
323 Z5 mutants showing association with endogenous REH2,  $^{\text{H}2}\text{F1}$ , REL1 and GAP1. Non-specific  
324 species in pulldowns (\*) are indicated. **(F)** Charts of the relative levels of associated  
325 endogenous proteins in the pulldowns +/-1 SD,  $n=2$  or  $n=3$ , as in Fig. 3.

326

327 *N- and C-truncations.* Because mutagenesis of the tested Znf domains did not prevent the  
328 association of  $^{\text{H}2}\text{F1}$  with other editing components *in vivo*, we asked if fragments of  $^{\text{H}2}\text{F1}$  retain these  
329 interactions. To test this question, we expressed N- or C-terminal fragments including Znf1-to-Znf3  
330 (termed  $\Delta\text{C}$ ) or Znf4-to-Znf8 (termed  $\Delta\text{N}$ ) that span 49% and 51% of the  $^{\text{H}2}\text{F1}$  polypeptide chain,  
331 respectively (Fig. 5A, bottom). These two fragments exhibited minimal or no association with the  
332 examined endogenous REH2,  $^{\text{H}2}\text{F1}$ , or REL1 ligase (Figs. 5A). Independent pulldowns of the  $^{\text{H}2}\text{F1}$   
333 truncated constructs confirmed these defects in association (data not shown). These mutants were  
334 directly compared with the  $^{\text{H}2}\text{F1}$  WT and Znf4 (R/K>Ala) constructs. The Znf4 like other Znf mutations

335 in the current study retained all tested interactions that are observed with the  $^{\text{H}2}\text{F1}$  WT control. Thus,  
336 the  $\Delta\text{N}$  and  $\Delta\text{C}$  constructs failed to establish basic interactions with the tested editing components.  
337 Because the native REH2C subcomplex carries mRNA (4), we wondered if the  $^{\text{H}2}\text{F1}$   $\Delta\text{N}$  and  $\Delta\text{C}$   
338 constructs also fail to co-purify with mRNA. To this end, we quantitated the relative content of  
339 mitochondrial transcripts in the pulldowns of the WT,  $\Delta\text{N}$ , and  $\Delta\text{C}$  constructs in biological replicate  
340 experiments that were performed in triplicate (Fig. 5B). The examined mitochondrial transcripts  
341 include examples of unedited, edited, and never-edited mRNA, the never-edited mRNA ND4, and  
342 ribosomal RNA 9S. We also examined cytosolic transcripts (Tubulin, 1400 and 1390) to score non-  
343 specific RNA interactions of editing subcomplexes as in previous pulldown studies (5). Relative to the  
344  $^{\text{H}2}\text{F1}$  WT control used for normalization, both  $\Delta\text{N}$  and  $\Delta\text{C}$  pulldowns exhibited a dramatic loss in  
345 bound mitochondrial mRNAs (Fig. 5B, upper and middle panels). Interestingly, the levels of cytosolic  
346 mRNAs were similar in the  $\Delta\text{N}$  and WT proteins but dramatically less in the  $\Delta\text{C}$  variant. We also  
347 compared the relative impact of the  $\Delta\text{N}$  and  $\Delta\text{C}$  deletions with a more discrete alteration in the Znf4  
348 construct (R/K>Ala); Fig. 5B, lower panel). The level of mitochondrial RNAs in the Znf4 pulldown was  
349 similar to that of the  $^{\text{H}2}\text{F1}$  WT control. However, the level of cytosolic transcripts decreased  $\sim 70$  fold  
350 in Znf4. The independent pulldowns and RNA quantitation in three equivalent experiments showed  
351 consistent results in the protein interactions and RNA content of these  $^{\text{H}2}\text{F1}$  constructs. (Fig. 5A).  
352 Thus, the tested  $^{\text{H}2}\text{F1}$  fragments appear to have lost the normal direct interaction of  $^{\text{H}2}\text{F1}$  WT with  
353 REH2 in REH2C and the RNA-dependent association of  $^{\text{H}2}\text{F1}$  WT with other examined proteins in the  
354 editing apparatus. Quantitation of the examined transcripts in the input extracts (including those used  
355 in the pulldowns in Figs. 5A-B) confirmed that the observed dramatic loss in RNA association with  $\Delta\text{N}$   
356 and  $\Delta\text{C}$  constructs was not due to large changes in the transcripts levels at steady state (S4 Fig.).  
357 The above observations indicated that features in both termini of  $^{\text{H}2}\text{F1}$  are required for efficient  
358 association of mitochondrial transcripts in the pulldowns of  $^{\text{H}2}\text{F1}$ . Also, C-terminal features in  $^{\text{H}2}\text{F1}$   
359 potentially including Znf4-to-Znf8, may be largely responsible for the observed non-specific

360 association of cytosolic transcripts in the pulldowns of  $^{\text{H2}}\text{F1}$  (Fig. 5B, compare the top and middle  
361 panels). Finally, the more discrete mutation in Znf4 may have caused a relatively mild decrease in  
362 RNA affinity that mostly affected weak, non-specific interactions, e.g., by cytosolic RNA in the  
363 pulldowns of  $^{\text{H2}}\text{F1}$ .

364

365 **Figure 5. *In vivo* analyses of  $^{\text{H2}}\text{F1}$  terminal deletion and Znf4 mutants. (A)** IgG pulldowns of  
366 N and C truncation mutants ( $\Delta\text{N}$  and  $\Delta\text{C}$ ) that removed Znf1-3 and Znf4-8, respectively, and the  
367 Znf4 R/K>A substituted (Z4) variant. Association of the constructs with endogenous REH2,  $^{\text{H2}}\text{F1}$   
368 and REL1 was examined. Cartoon of  $^{\text{H2}}\text{F1}$  with zinc fingers and a line marking the N and C  
369 truncations. **(B)** qRT-PCR quantitation of RNA transcripts in the pulldowns in panel A. dCq of  
370 IgG pulldowns of tagged protein (induced extract) normalized to a mock pulldown (uninduced  
371 extract) [ $\text{dCq} = 2^{(\text{test Cq} - \text{mock Cq})}$ ] for each construct. The mutant proteins were then normalized to  
372 the tagged WT protein. All values took into account the recovery of tagged protein in each  
373 pulldown. Three independent biological replicates with Cq average values and one standard  
374 deviation ( $\pm 1$  SD,  $n=3$ ) were plotted. The replicates suggest a similar quality and loading of  
375 samples in the pulldowns. Non-specifically associated cytosolic transcripts differed substantially  
376 in pulldowns of different mutants, so these transcripts were not used as reference. Mitochondrial  
377 unedited (UE) and edited (ED) and cytosolic RNA transcripts are indicated. 1390 and 1400 are  
378 abbreviations for the cytosolic HGPRT isoforms Tb927.10.1390 and Tb927.10.1400,  
379 respectively.

380

### 381 **Analysis of recombinant REH2 *in vitro***

382

383 The conserved predicted catalytic domains in REH2, the impact of mutating catalytic amino  
384 acids *in vivo*, and the observed unwinding activity of pulldowns of REH2 and  $^{\text{H2}}\text{F1}$  from extracts  
385 indicate that REH2 in the context of its native subcomplex in trypanosomes functions as an RNA



386 helicase (3, 4, 22). However, the unwinding activity of the isolated REH2 has not been formally  
387 established. We have now generated a recombinant full-length rREH2 polypeptide (240 kDa) that  
388 supports robust ATP-dependent unwinding of a synthetic dsRNA substrate *in vitro*. This dsRNA  
389 substrate is a mimic of the native A6 editing system formed by pre-annealing of a 3' fragment of  
390 the pre-mRNA A6 with a cognate gRNA. The synthetic A6 mRNA/gRNA pair supports a full  
391 round of U-deletion editing in an *in vitro* assay with cell extracts and purified RECC enzyme (26,  
392 27). The unwinding activity of the recombinant enzyme increased in a titration with increasing  
393 concentrations of rREH2, and also in a time course up to 30 min when most of the annealed  
394 radiolabeled RNA was unwound (Figs. 6A-B). An upshift of radiolabeled RNA in a ribonucleoprotein  
395 complex at the highest tested concentrations of rREH2 in the titration may be due to the known RNA  
396 binding activity of the native REH2 established by UV crosslinking (5, 22). The shifted species is  
397 sensitive to proteinase K (data now shown). The radiolabeled strand alone (gRNA) and in heat-  
398 treated controls of the dsRNA substrate exhibit the same gel mobility as the helicase-unwound gRNA  
399 (Figs. 6B-C). Interestingly, a N-terminal truncated rREH2 polypeptide that lacked both dsRBDs was  
400 inactive *in vitro* (data not shown). In summary, the isolated 240 kDa recombinant REH2 is a *bona fide*  
401 RNA helicase enzyme *in vitro*, and further supports the idea that REH2 may remodel RNA or its  
402 RNPs in editing.

403

404 **Figure 6. Recombinant rREH2 is a catalytically active RNA helicase. (A)** Unwinding assays  
405 in 10  $\mu$ L reaction mixtures with increasing concentrations of rREH2[30-2167] +/- ATP; **(B)**  
406 Unwinding assays at increasing incubation times with rREH2[30-2167] +/- ATP using the  
407 standard reaction mixture described in the material and methods section. The standard reaction  
408 used a molar excess of enzyme over substrate. The dsRNA (ds) was assembled by pre-  
409 annealing of synthetic transcript that mimics a 3' fragment of the *T. brucei* A6 pre-edited mRNA  
410 and a radiolabeled cognate guide RNA (26). Radiolabeled unwound ssRNA (ss) is indicated.  
411 Input dsRNA was heat denatured ( $\Delta$ ) as control. **(C)** Additional controls showing that the starting

412 radiolabeled ssRNA used to generate the dsRNA substrate in the assay and the unwound  
413 radiolabeled ssRNA in the heat-denatured ( $\Delta$ ) dsRNA (in panel B) have the same gel mobility.

414

## 415 Discussion

416  
417 In the current study, we generated and characterized over 20 constructs of REH2 and  $^{\text{H}2\text{F}1}$   
418 (Tables 1 and 2) to identify features in these editing proteins that impact the stability of REH2, the  
419 assembly of the REH2C RNP, and its RNA-mediated coupling with other components of the RNA  
420 editing holoenzyme (or RNA holo-editosome). We also formally established that the isolated REH2 is  
421 a *bona fide* RNA helicase enzyme.

422

423 The core RECC enzyme and its accessory *trans* factors RESC and REH2C that assemble  
424 around mRNA exhibit transient and stable contacts with each other via RNA. Also, variants of RECC  
425 or the GRBC and REMC modules in RESC are emerging in studies by different labs (reviewed in 1).  
426 These variants imply a dynamic nature of holo-editosomes that may be important in editing control  
427 and needs further characterization. The helicase complex REH2C exhibits transient and stable  
428 contacts with variants of RESC that minimally differ in the relative content of MRB3010 (in the GRBC  
429 module). In this study, we focused on stable interactions by REH2C that can be readily examined.  
430 Prior studies *in vivo* showed that inactivating mutations in the helicase ATP binding site or the  
431 dsRBD2 domain dissociate REH2 from GAP1, gRNA and mRNA, reflecting a general helicase  
432 detachment from the editing apparatus (3).  $^{\text{H}2\text{F}1}$  RNAi dissociates the helicase from the canonical  
433 RESC markers GAP1 and RGG2. The RNAi knockdown of either  $^{\text{H}2\text{F}1}$  or REH2 inhibits editing  
434 associated with a RESC variant that is particularly active and transiently interacts with the helicase  
435 REH2 (3, 4). These and other observations indicate that transient and stable contacts in dynamic  
436 holo-editosomes including those involving REH2C are important.

437 The section below discusses examined mutations in REH2 and <sup>H2</sup>F1 in the current study that  
438 identified features affecting the proper assembly of the REH2C RNP, or its association with other  
439 components of holo-editosomes *in vivo*.

440

#### 441 **REH2 mutants *in vivo***

442

443 The NTR truncations examined here (>1000 residues each),  $\Delta$ N and  $\Delta$ Nds, exhibited a  
444 reduced binding with <sup>H2</sup>F1 and reduced RNA-mediated association with GAP1. The only difference  
445 between these constructs is that  $\Delta$ N carries the ~70 amino acid dsRBD2 domain but  $\Delta$ Nds does not.  
446 The dsRBD2 is necessary for the proper assembly of REH2 in holo-editosomes (3). Also, the  
447 dsRBD2 in the related helicase MLE in flies seems to provide a major RNA-binding surface,  
448 presumably due to its potential to bind A-form double helical RNA (28, 29). The tested truncations  
449 suggests that other N-terminal features besides dsRBD2, e.g., dsRBD1 or unidentified motifs  
450 contribute to normal interactions by REH2 *in vivo*. These truncations may also introduce changes in  
451 topology that alter the normal REH2 interactions. Conformational changes are known to modulate  
452 functional interactions by other eukaryotic DExH/RHA helicases (18, 30). Thus, the tested NTR  
453 truncations may indicate the presence of unidentified protein features or global changes in  
454 conformation that affect the REH2 interactions. Further studies will be needed to resolve these  
455 possibilities. However, relatively short CTR truncations and specific point mutations discussed below  
456 also affected the REH2 interactions with other editing components. These short truncations and  
457 particularly point mutations in the C-terminus are less likely to cause major conformation changes in  
458 REH2.

459

460 We have speculated that the highly conserved OB fold in DExH/RHA subfamily helicases  
461 may share functional residues in kinetoplastid RNA editing and other RNA processes (14). Our  
462 examined C-terminal truncations included most of the CTR (260 residues in  $\Delta$ OB) or elements

463 beyond the OB fold that may be specific of REH2 (123 residues in  $\Delta$ AOB). The conserved and  
464 specific C-terminal features of REH2 could work in synergy. We compared specific conserved  
465 residues in REH2 and in helicase Prp43p in yeast spliceosomes. R1979 and R2023 in REH2  
466 (R664 and R708 in the RNA helicase Prp43p) (16) should be located in two critical loops,  $\beta$ 1- $\beta$ 2  
467 and  $\beta$ 4- $\beta$ 5, respectively. In yeast, R664 and R708 are poised to interact with the RNA substrate  
468 entering the helicase cavity, and mutation of either residue inhibits the RNA binding and RNA-  
469 mediated activation of Prp43p (16). In trypanosomes, the R2023A substitution had a moderate  
470 effect on the stable association of REH2C with GAP1. However, R1979A did not evidently affect  
471 this interaction. Neither R1979A or R2023A seem to significant effect on the REH2 interaction  
472 with  $H^2F1$ .

473 Similarly, H1998 and R1999 in REH2 were compared to the equivalent H1032 and  
474 K1033 positions in the RNA helicase MLE in flies. The later residues in MLE bind specific  
475 uridylates in U-rich roX boxes of the cognate roX RNA. H1032 and K1033 are also required for  
476 the proper function and chromosomal localization of MLE in the *Drosophila* dosage  
477 compensation complex (18). The H1998E substitution had a moderate effect on the REH2  
478 association with GAP1 but had little or no effect on the interaction with  $H^2F1$ . In contrast, the  
479 adjacent substitution R1999E affected both the direct REH2 interaction with  $H^2F1$  and the RNA-  
480 based REH2 association with GAP1. These results are consistent with a propose role of  $H^2F1$  as  
481 an adaptor protein of REH2 (4). So, structure-function correlations may be tractable to specific  
482 conserved helicase amino acids in protozoa and vertebrate species. This is in line with the idea  
483 that the OB fold in DExH/RHA helicases, including REH2, is a conserved regulatory domain.

484

#### 485 $H^2F1$ mutants *in vivo*

486  $H^2F1$  has eight predicted C2H2 Znf domains that are spread out and cover over ~45% of the  
487 polypeptide sequence. Apart from the Znf domains,  $H^2F1$  has no evident sequence or structural  
488

489 conservation outside of the kinetoplastids.  $H^2F1$  is as an adaptor protein that brings the REH2 to the  
490 editing machinery (4) and it is also a stabilizing factor of REH2. That is, the induced downregulation  
491 of  $H^2F1$  caused fragmentation of REH2 (4), and we showed here that the converse upregulation of  
492  $H^2F1$  increased the steady-state level of REH2 *in vivo*.  $H^2F1$  may require most of its zinc fingers to  
493 stabilize REH2 because substitution of core residues or variable basic residues in individual fingers  
494 compromised this function. Thus,  $H^2F1$  binding to REH2 may induce substantial changes in the  
495 helicase conformation and stability. The stabilizing role of  $H^2F1$  may involve the coordinated topology  
496 of its zinc fingers. Notably, all examined  $H^2F1$  substitution-mutants were able to associate with REH2,  
497 GAP1, and REL1. So, the basic fold or positive charge of the fingers is not essential for the  
498 association of  $H^2F1$  with other editing components. However, N- or C-terminal truncation of nearly half  
499 the size of  $H^2F1$  hampered its normal interactions with the examined editing components. Additional  
500 studies are needed to pinpoint specific determinants for  $H^2F1$  direct binding to REH2 or its RNA-  
501 mediated contacts with other editing components.

502 Besides the REH2• $H^2F1$  system, other DExH/RHA helicase•Znf protein pairs have been  
503 characterized (14): the MOP•MEP-1 system in worm embryogenesis, and the DXH30•ZAP system in  
504 antiviral protection in humans (31, 32). The antiviral protein ZAP has four Znf motifs that participate  
505 in viral RNA recognition (32). All four fingers are on a positively charged surface in a crystal structure  
506 of ZAP (24). and substitution of the basic residues in the fingers inhibited the antiviral functions of  
507 ZAP (32). Insights from the ZAP structure imply that stabilization of REH2 by  $H^2F1$  involves a precise  
508 topology of its zinc fingers and a role of its fingers in RNA binding. Notably, the Znf proteins ZAP and  
509 MEP-1 multimerize. If  $H^2F1$  dimerizes as it was shown for recombinant ZAP (24) a single REH2C  
510 RNP would include 16 zinc fingers. The co-purification of tagged and endogenous  $H^2F1$  from RNase-  
511 treated extracts suggest the presence of direct protein contacts between the  $H^2F1$  copies (S3 Fig.).  
512 However, analyses of recombinant  $H^2F1$  are necessary to establish the potential of  $H^2F1$  to  
513 multimerize or bind RNA. The RNA content in pulldowns of a  $H^2F1$  variant with four R/K>Ala  
514 substitutions in Znf4 suggested minimal changes in association with target RNAs in mitochondria but

515 a significance loss in non-specific contacts with unrelated transcripts. So, subtle changes in RNA  
516 affinity are more likely to affect weak non-specific RNA contacts. The dramatic loss of all transcripts  
517 examined in the pulldowns of the tested <sup>H2</sup>F1 fragments suggest that efficient RNA association by the  
518 REH2C subcomplex *in vivo* requires the full array of zinc fingers in <sup>H2</sup>F1. Unfortunately, we were  
519 unable to maintain stable expression an <sup>H2</sup>F1 construct with mutations in all fingers or subsets of  
520 fingers (data not shown). We note that the transcripts examined may associate with either <sup>H2</sup>F1,  
521 REH2 or both proteins in the native REH2C RNP.

522

### 523 **REH2 may function as an RNA helicase in kinetoplastid RNA editing**

524

525 Prior studies support the idea that REH2 is a functional RNA helicase in the context of the  
526 editing apparatus. That is, REH2 pulldowns from GAP1-depleted extracts exhibit RNA unwinding  
527 activity. Also, mutation of conserved catalytic residues in the predicted RecA1 domain inhibits the  
528 unwinding activity of REH2 pulldowns from mitochondrial extracts (22). We have now established  
529 that the isolated full-length recombinant REH2 (240 kda) is a *bona fide* RNA helicase enzyme.  
530 Additional studies are needed to determine if <sup>H2</sup>F1 affects the unwinding activity of REH2. Thus,  
531 REH2, the only DExH/RHA-type RNA helicase in kinetoplastid holo-editosomes most likely provides  
532 an ATP-dependent unwinding activity in RNA editing. Besides REH2, the editing apparatus also  
533 requires the DEAD-box RNA helicase REH1 (12, 13). This helicase is not considered to be a subunit  
534 of the RNPs studied here and no potential binding partner of REH1 has been identified. A transient  
535 RNA-mediate interaction of REH1 with other editing proteins has been detected (22, 33).  
536 Important functional differences are known between the two ATP-dependent RNA helicases.  
537 REH2 is needed for editing within single blocks, including the first “initiating” block (3). In  
538 contrast, REH1 is needed for editing of two or more blocks (i.e., by overlapping gRNAs) but has  
539 no effect on the first block (13). Both RNA helicases may be involved in critical remodeling of  
540 RNA or RNP structure. REH1 may promote the relay of gRNAs as editing progresses from one

541 block to the next. Our ongoing RNA-seq analyses suggest that REH2 may impact the editing  
542 efficiency at the individual sites and may provide additional functional insights concerning  
543 REH2C (Kumar et al., unpublished).

544

## 545 **Possible roles of editing complex variants**

546

547 The editing apparatus much like the splicing and transcription molecular machines may  
548 exhibit dynamic phases of assembly and function. The native RECC enzyme has multiple  
549 isoforms, and several RNase III-like protein subunits in RECC predict a binary combinatorial  
550 potential that may add fine-tuning in editing function (34-36). Also, natural GRBC and REMC  
551 isoforms and genetically-induced changes in the organization of their protein and RNA  
552 components are emerging. A recurring theme in the known examples is the variable interaction  
553 between the GAP1/2 heterotetramer that is required for all editing involving GRBC-bound  
554 gRNAs, and MRB3010 (GRBC6) that participates in early editing (1, 6, 37). A controlled  
555 interaction of the GAP1/2 tetramer with MRB3010 may be used to modulate editing. For  
556 example, GRBC variants in direct pulldowns of MRB3010 or REH2 pulldowns differ in their  
557 relative content of MRB3010 and editing level in examined associated mRNAs (3, 5). However,  
558 RNAi of REH2 or <sup>H2</sup>F1 reduced the editing level in mRNAs in the MRB3010 pulldowns (3, 4).  
559 REH2 and <sup>H2</sup>F1 features, including those examined in the current studies, are expected to affect  
560 specific steps in the editing mechanism and current studies in our lab are addressing this.  
561 Variations in MRB3010 or other critical RESC proteins may distinguish pre-editosomes from  
562 fully-active editosomes. Dynamics in complex assembly could also pause editing facilitating  
563 helicase remodeling of RNA or RNPs. Additional studies are needed to examine these  
564 possibilities in editing control.

565

## 566 **Materials and methods**

567

### 568 **Cell Culture**

569

570 *T. brucei* Lister strain 427 29-13 procyclic was grown axenically in log phase in SDM79

571 medium (38) and harvested at a cell density of  $1-3 \times 10^7$  cells/mL. All transgenic cell lines were

572 induced with tetracycline at  $1 \mu\text{g/mL}$ . The TbRGG2 (alias RGG2) RNAi cell line was provided by

573 the Read lab (39). The GAP1 and  $\text{H}^2\text{F1}$  RNAi cell lines that were used as controls in some

574 analyses were generated in our lab (3, 4). We have seen that the TAP tag in REH2 or  $\text{H}^2\text{F1}$ ,

575 including WT constructs, seems to slow the growth of trypanosomes after several days of

576 culture (22)(data not shown). This and presumably incomplete cloning after transfection may

577 account for the uneven expression levels in extracts from independent subcultures. To partially

578 control for this issue, most plasmid constructs in the current study were re-made to use

579 puromycin selection. Transfections were also repeated with tetracycline-screened HyClone

580 Fetal Bovine Serum (FBS) (SH30070.03T; GE Healthcare. This enabled a faster cell recovery

581 after transfection than with constructs using phleomycin selection that were originally

582 characterized (data not shown). Regardless of this issue, independent analyses of protein

583 (complex) interactions were consistent with either puromycin or phleomycin constructs.

584

### 585 **DNA constructs**

586

587 All overexpression and RNAi studies used inducible plasmid constructs. The constructs

588 for  $\text{H}^2\text{F1}$  RNAi and the REH2 dsRBD2 mutant K1078A/A1086D were previously reported (3, 4).

589 N-terminal deletion constructs for REH2 ( $\Delta\text{N}$  and  $\Delta\text{Nds}$ ) and  $\text{H}^2\text{F1}$  ( $\Delta\text{N}$ ) were prepared using the

590 In-Fusion® HD Cloning Kit (639648; Clontech). Two PCR amplicons were prepared in each

591 case using CloneAmp™ HiFi PCR Premix (638500; Clontech) and were then gel-eluted using

592 NucleoSpin® Gel and PCR Clean-up (740609.10; Clontech). One amplicon encodes the first 34

593 amino acids of REH2 (primers: F-1503, R-1522), including the predicted REH2 mitochondrial



594 leader sequence (REH2-MLS) (22), that was used for all N-deletion constructs. The other  
595 amplicon included the remaining relevant gene fragment sequence: 3070-6501 bases (REH2  
596  $\Delta$ N), 3280-6501 bases (REH2  $\Delta$ Nds), or 766-1572 bases ( $^{\text{H}2}\text{F1}$   $\Delta$ N). Three-piece in-fusion  
597 reactions were performed to join the two amplicons and pLEW79-ada-TAP plasmid linearized at  
598 *XhoI* and *BamHI* (40). The PCR primers (S1 Table) included 5' and 3' terminal homology (15  
599 bases) to enable the recombination-based fusion between the amplicons and the plasmid DNA.  
600 The REH2 ( $\Delta$ AOB and  $\Delta$ OB) and  $^{\text{H}2}\text{F1}$   $\Delta$ C deletion constructs are also recombination-based  
601 fusions of the amplified relevant gene fragment with linearized plasmid DNA. The REH2  
602 constructs R2023A, H1998E, R1999E and H1998E/R1999E, and the  $^{\text{H}2}\text{F1}$  constructs Z5 C>A  
603 and Z5 R/K>A, were created by site-directed mutagenesis in inverse-PCR reactions of the  
604 pLEW79-ada-TAP WT plasmid as the template. pLEW79-ada-TAP was modified from the  
605 original pLEW79-TAP (40, 41). The resulting linearized mutant constructs were circularized  
606 using the In-Fusion HD Cloning Kit. Other  $^{\text{H}2}\text{F1}$  constructs used synthetic gBlock gene  
607 fragments (IDT) with mutations in single or multiple zinc-fingers. The gBlock fragment  
608 sequences were fused as follows. A full-length  $^{\text{H}2}\text{F1}$  sequence with all fingers mutated (Z1-8  
609 C>A) was cloned into *XhoI/BamHI* sites of the plasmid vector. N-terminal fragments of  $^{\text{H}2}\text{F1}$  (Z1,  
610 Z2 and Z3 R/K>A single finger mutants) replaced the corresponding sequence in the  $^{\text{H}2}\text{F1}$  WT  
611 construct after digestion with *XhoI* and the internal *ApaI* site in  $^{\text{H}2}\text{F1}$ . C-terminal fragments of  
612  $^{\text{H}2}\text{F1}$  (Z4 and the multi-finger mutant Z6-Z8) replaced corresponding sequence in the  $^{\text{H}2}\text{F1}$  WT  
613 construct after digestion with *ApaI* and *BamHI*. All constructs were confirmed by DNA  
614 sequencing, linearized with *NotI*, and transfected in trypanosomes (38).

615

## 616 **Western Blots and Radioactivity Assays**

617

618 Western blots of REH2,  $^{\text{H}2}\text{F1}$  and  $^{\text{H}2}\text{F2}$  (subunits of REH2C), GAP1 (alias GRBC2;

619 subunit of GRBC) and A2 (alias MP42; subunit of RECC) were performed as reported (4, 22).

620 Western blots of the GAP1/GAP2 (alias GRBC2/GRBC1) paralogs simultaneously, and of  
621 MRB8170 and MRB6070 (subunits of REMC and MRB6070/1590 assemblies, respectively),  
622 were performed as previously described (42, 43). Peroxidase Anti-peroxidase antibody (P1291;  
623 Sigma) diluted to 1:200 (v/v) was used to detect the TAP-tag. Protein quantitative analyses  
624 using Amersham ECL<sup>TM</sup> western blot detection reagents were performed in an Amersham  
625 Imager 600. RNA ligases in the RECC enzyme were radiolabeled by self-adenylation directly on  
626 the beads in IgG pulldowns (44). Unwinding assays of REH2 used reported conditions with a  
627 few modifications (4) and full-length recombinant His-REH2. The dsRNA substrate in these  
628 assays used an A6 mRNA/gRNA pair (22). The A6 pair mimics the endogenous ATPase subunit  
629 6 substrate. The gRNA was transcribed with RNA T7 polymerase from an amplicon (S1 Table)  
630 after *DraI* restriction digestion and gel purification of the product. The 61-nt gRNA was 5'-  
631 labelled with  $\gamma^{32}\text{P}$ -ATP using T4 Polynucleotide kinase. The 62-nt mRNA was synthetic (IDT). A  
632 mix with 3 pmoles of labelled gRNA and 15 pmoles of mRNA was heated at 95° C for 3 min,  
633 and then immediately incubated for 30 min at room temperature in the annealing buffer (10 mM  
634 MOPS pH 6.5, 1 mM EDTA, and 50 mM KCl). The annealed RNA hybrids were isolated from  
635 native 12% PAGE run at 4 °C at 50 V for 120 min in 0.5x Tris-borate-EDTA buffer. Standard 10  
636  $\mu\text{L}$  reaction mixtures in unwinding buffer (40 mM Tris-Cl pH 8.0, 0.5 mM  $\text{MgCl}_2$ , 0.01% Nonidet  
637 P-40, and 2 mM DTT) were incubated for 30 min at 19 °C with 20 cps of hybrid (~20 fmoles)  
638 and 3  $\mu\text{g}$  of recombinant REH2 (~12 pmoles). Variations to the standard assay including in the  
639 concentration of REH2 or the reaction time are indicated in the text. All assays contained 100  
640 fmoles of unlabeled gRNA as competitor to prevent re-annealing of unwound  $\gamma^{32}\text{P}$ -gRNA. The  
641 assays were stopped with an equal volume of 2x helicase reaction stop buffer (50 mM EDTA,  
642 1% SDS, 0.1% bromophenol blue, 0.1% xylene cyanol, and 20% glycerol) and kept on ice for 5  
643 min. The assays in Fig. 6B were also treated with 0.4U of proteinase K (P8107S; NEB), 25 mM

644 EDTA and 0.5% SDS at 22° C for 30 min. The entire reaction was loaded onto a native 12%  
645 PAGE and resolved at 25 V for 120 min at 4°C.

646

## 647 **Cell extracts and purification of protein and RNA from IgG pulldowns**

648  
649 Whole cell extracts as well as mitochondria-enriched extracts were used in this study.

650 Whole-cell extracts were generated by incubation of cell pellets in MRB-Triton buffer (25 mM  
651 Tris-Cl pH 8.0, 10 mM MgOAc, 1 mM EDTA, 10 mM KCl, 5% glycerol, 0.5% Triton X-100) at 4  
652 °C for 45 minutes followed by centrifugation at 15,000g for 30 minutes. Mitochondria-enriched  
653 extracts were prepared using a simplified protocol similar to others reported earlier (2, 45).  
654 Namely, cell pellets were resuspended into hypotonic DTE buffer (1 mM Tris-HCl pH 8.0, 1 mM  
655 EDTA pH 8.0) supplemented with protease inhibitors and disrupted in a Dounce homogenizer.  
656 The suspension was passed through a 26-gauge needle as originally described (46). The  
657 enriched mitochondrial vesicles were spun down and the cytosolic content in the supernatant  
658 discarded. This step improved the recovery of intact REH2 compared to whole-cell extracts.  
659 REH2 is more prone to fragmentation than other proteins examined in this study. The following  
660 steps were also as in (46). The pellet was resuspended into STM buffer (0.25M Sucrose, 20 mM  
661 Tris-HCl pH 8.0, 2 mM MgCl<sub>2</sub>) supplemented with DNase I, RNase-free (EN0523; Fisher  
662 Scientific). The reaction was stopped with one volume of STE buffer (0.25 M Sucrose, 20 mM  
663 Tris-HCl pH 8.0, 2 mM EDTA pH 8.0). The enriched mitochondria were spun down and washed  
664 in STE buffer. The pellet was resuspended into MRB-Triton buffer and incubated in ice for 15  
665 min. The suspension was spun down at 15,000g at 4 °C for 30 min. The supernatant was  
666 collected and stored at -80 °C. In IgG pulldowns of the extracts, ectopically expressed TAP-  
667 REH2 and TAP-<sup>H2</sup>F1 were recovered as reported (4, 22) with some modifications.  
668 Approximately 2 mg of protein was mixed with 1x SUPERase-In™ RNase inhibitor (Invitrogen™)  
669 and incubated with Dynabeads IgG (11203D; Invitrogen™). The beads were washed five times

670 with 1ml of wash buffer (150 mM NaCl, 1 mM EDTA, 10 mM MgAOC, 0.1% NP-40, and 25 mM  
671 Tris pH 8.0). Protein was eluted from the beads with 15  $\mu$ L of 1x SDS loading buffer at 95 °C for  
672 2 min. RNA was extracted by treating the beads with 4U proteinase K (NEB) for 2 hrs at 55 °C,  
673 followed by phenol extraction and ethanol precipitation. For some pulldowns, RNase A/T1 mix  
674 (EN0551; Fisher Scientific) was applied at 20 U/mg of protein both in the input extract and again  
675 while bound to the beads.

676

### 677 **Quantitative RT-PCR**

678

679 Isolated RNA from the pulldowns or directly from input extracts was treated with DNase  
680 I, RNase-free (EN0523; Thermo Scientific™) prior to cDNA synthesis with the iScript™ Reverse  
681 Transcription Supermix (Bio-Rad) as described elsewhere (5). The amplifications mixtures (10  
682  $\mu$ l) used SsoAdvanced™ Universal SYBR® Green Supermix (Bio-Rad) and reported  
683 oligonucleotides for unedited mRNAs, fully edited mRNA, and reference transcripts (47). Diluted  
684 samples of the examined cDNA produced a single amplicon during linear amplification under  
685 our conditions. The end-point amplicons described here have been gel-isolated, cloned and  
686 confirmed by sequencing (5) (data not shown). Fold-enrichment of mitochondrial and cytosolic  
687 transcripts in IgG pulldowns of tagged proteins (induced extracts), relative to a mock pulldown  
688 (uninduced extract), was calculated as follows:  $\text{Fold} = 2^{[-\text{ddCq}]}$ , where  $\text{ddCq} = \text{Cq test IP} - \text{Cq}$   
689  $\text{mock IP}$ , as in (5). The relative value for each mutant construct was adjusted to the amount of  
690 recovered tagged protein, and subsequently normalized to the tagged WT construct (= 1). The  
691 plot in Fig. 5B was constructed using data from 3 independent biological replicate experiments,  
692 including a total of six amplicons per data point (i.e., two technical replicate amplicons per  
693 assay). Two of the independent experiments (including cultures +/- Tet for each mutant) were  
694 performed concurrently. The third independent experiment (one set of cultures per mutant +/-  
695 Tet) was conducted on a subsequent date. The replicate experiments showed a consistent

696 sample loading in the assays used in our plots. The examined mutant constructs differed in the  
697 amount of non-specific association with Tubulin and other cytosolic transcripts that are normally  
698 used as internal reference in antibody pulldowns using a common protein bait. The raw Cq  
699 values of examined editing transcripts in the pulldowns and the plotted values after  
700 normalization indicated a substantial loss of these transcripts in the truncated mutants.  
701 qRT-PCR assays of input extract in S4 Fig. were normalized using the following equation: Ratio  
702 (reference/target) =  $2^{[Cq(ref) - Cq(target)]}$ . This scores the relative difference between the reference  
703 and target Cq values. The current plots of input extract used 18S rRNA as reference (S4 Fig.).  
704 Similar results were obtained with any of these cytosolic transcripts used as a reference: tubulin,  
705 1400 or 1390 (Tb927.10.1400 or Tb927.10.1390, respectively) (data not shown).

706

## 707 **Homology modeling and bioinformatic analysis**

708  
709 The multiple-sequence alignment of REH2 and MLE was done with Clustal Omega (48),  
710 and that of the <sup>H2</sup>F1 zinc finger domains was done with BOXSHADE version 3.21  
711 ([http://www.ch.embnet.org/software/BOX\\_form.html](http://www.ch.embnet.org/software/BOX_form.html)). The homology models of the helicase  
712 region of *T. brucei* REH2 were built using the program Phyre2 (20).

713

## 714 **Recombinant protein**

715  
716 6xHis-REH2 (amino acid residues 30-2167) was amplified by PCR (S1 Table). The gel-  
717 purified product was cloned into the NcoI and BamHI sites in the expression vector pET15b by  
718 using the NEBuilder® HiFi DNA Assembly Master Mix (E262, NEB) and the appropriate primers.  
719 The ligation reaction mixtures were transformed into chemically competent Omnimax cells from  
720 ThermoFisher Scientific. Colonies with the correct insert were identified by single-colony PCR  
721 and then amplified for plasmid purification. The sequence of the flanking vector region and the  
722 insert was checked by DNA sequencing. The plasmid DNA was transformed into Rosetta2 DE3  
723 cells (Novagen Inc.) and overexpressed in 4 L of Terrific Broth media by supplementing 2% (v/v)

724 ethanol and 2 mM MgCl<sub>2</sub> at 37 °C. Protein induction with 0.5 mM IPTG was done at a OD<sub>600</sub> of  
725 0.8, and the expression was continued for 22 hours at 16 °C. The cell pellet was stored at -80  
726 °C overnight and was resuspended in lysis buffer (5 mL/g of cell pellet) of 50 mM Tris-HCl pH  
727 8.0, 250 mM NaCl, 1 mM EDTA, and 1 mM DTT along with 10 µg of RNase-free DNase and 15  
728 mg of hen egg white lysozyme. The cells were lysed in an Emulsiflex hydraulic press. The cell  
729 debris was pelleted at 39,200 x g for 30 minutes at 4 °C. The supernatant with 6xHis-REH2 was  
730 batch attached to equilibrated Qiagen Ni-NTA Agarose at 4 °C for 16 hrs. The complex was  
731 eluted with 50 mM Tris-HCl pH 8.0, 300 mM NaCl, 1 mM DDT, and 250 mM imidazole. The first  
732 elution of the purification was dialyzed into unwinding assay buffer. This material was tested for  
733 the presence of the recombinant protein in western blots and antibody pulldowns, and for  
734 activity in dsRNA unwinding activity assays *in vitro*.

735

## 736 **Acknowledgements**

737

738 We thank the Read lab for their gift of antibodies against GAP1, TbRGG2 (alias RGG2)  
739 and H<sup>2</sup>F2. The Afasizhev lab kindly provided antibodies that react against the GAP1/GAP2  
740 paralogs (alias GRBC2/GRBC1) simultaneously. We also thank the Stuart lab for providing the  
741 antibodies against A2 (alias MP42). Amna Mushtaq provided detailed comments on the  
742 manuscript. Jana Gomez, Elizabeth Alvarez and Melissa Yang helped with the preparation of  
743 figures.

744

745

746

747

## 748 **References**

749

- 750 1. Cruz-Reyes J, Mooers BHM, Doharey PK, Meehan J, Gulati S. Dynamic RNA  
751 holoeditosomes with subcomplex variants: Insights into the control of trypanosome editing.  
752 WIREs RNA. 2018;e1502.
- 753 2. Koslowsky DJ, Sun Y, Hindenach J, Theisen T, Lucas J. The insect-phase gRNA  
754 transcriptome in *Trypanosoma brucei*. Nucleic acids research. 2013.
- 755 3. Madina BR, Kumar V, Mooers BH, Cruz-Reyes J. Native Variants of the MRB1 Complex  
756 Exhibit Specialized Functions in Kinetoplastid RNA Editing. PloS one. 2015;10(4):e0123441.
- 757 4. Kumar V, Madina BR, Gulati S, Vashisht AA, Kanyumbu C, Pieters B, et al. REH2C  
758 Helicase and GRBC Subcomplexes May Base Pair through mRNA and Small Guide RNA in  
759 Kinetoplastid Editosomes. J Biol Chem. 2016;291(11):5753-64.
- 760 5. Madina BR, Kumar V, Metz R, Mooers BH, Bundschuh R, Cruz-Reyes J. Native  
761 mitochondrial RNA-binding complexes in kinetoplastid RNA editing differ in guide RNA  
762 composition. RNA. 2014;20(7):1142-52.
- 763 6. Aphasizheva I, Zhang L, Wang X, Kaake RM, Huang L, Monti S, et al. RNA binding and  
764 core complexes constitute the U-insertion/deletion editosome. Mol Cell Biol. 2014;34(23):4329-  
765 42.
- 766 7. Huang Z, Faktorova D, Krizova A, Kafkova L, Read LK, Lukes J, et al. Integrity of the  
767 core mitochondrial RNA-binding complex 1 is vital for trypanosome RNA editing. RNA. 2015.
- 768 8. McAdams NM, Simpson RM, Chen R, Sun Y, Read LK. MRB7260 is essential for  
769 productive protein-RNA interactions within the RNA editing substrate binding complex during  
770 trypanosome RNA editing. RNA. 2018;24(4):540-56.
- 771 9. Simpson RM, Bruno AE, Bard JE, Buck MJ, Read LK. High-throughput sequencing of  
772 partially edited trypanosome mRNAs reveals barriers to editing progression and evidence for  
773 alternative editing. RNA. 2016;22(5):677-95.

- 774 10. Simpson RM, Bruno AE, Chen R, Lott K, Tylec BL, Bard JE, et al. Trypanosome RNA  
775 Editing Mediator Complex proteins have distinct functions in gRNA utilization. *Nucleic acids*  
776 *research*. 2017;45(13):7965-83.
- 777 11. Shaw PL, McAdams NM, Hast MA, Ammerman ML, Read LK, Schumacher MA.  
778 Structures of the *T. brucei* kRNA editing factor MRB1590 reveal unique RNA-binding pore motif  
779 contained within an ABC-ATPase fold. *Nucleic acids research*. 2015;43(14):7096-109.
- 780 12. Missel A, Souza AE, Norskau G, Goringe HU. Disruption of a gene encoding a novel  
781 mitochondrial DEAD-box protein in *Trypanosoma brucei* affects edited mRNAs. *Mol Cell Biol*.  
782 1997;17(9):4895-903.
- 783 13. Li F, Herrera J, Zhou S, Maslov DA, Simpson L. Trypanosome REH1 is an RNA helicase  
784 involved with the 3'-5' polarity of multiple gRNA-guided uridine insertion/deletion RNA editing.  
785 *Proc Natl Acad Sci U S A*. 2011;108(9):3542-7.
- 786 14. Cruz-Reyes J, Mooers BH, Abu-Adas Z, Kumar V, Gulati S. DEAH-RHA helicase•Znf  
787 cofactor systems in kinetoplastid RNA editing and evolutionarily distant RNA processes. *RNA*  
788 *Dis*. 2016;3(2):e1336.
- 789 15. Jarmoskaite I, Russell R. RNA helicase proteins as chaperones and remodelers. *Annu*  
790 *Rev Biochem*. 2014;83:697-725.
- 791 16. Walbott H, Mouffok S, Capeyrou R, Lebaron S, Humbert O, van Tilbeurgh H, et al.  
792 Prp43p contains a processive helicase structural architecture with a specific regulatory domain.  
793 *EMBO J*. 2010;29(13):2194-204.
- 794 17. Robert-Paganin J, Rety S, Leulliot N. Regulation of DEAH/RHA helicases by G-patch  
795 proteins. *Biomed Res Int*. 2015;2015:931857.
- 796 18. Prabu JR, Muller M, Thomae AW, Schussler S, Bonneau F, Becker PB, et al. Structure  
797 of the RNA Helicase MLE Reveals the Molecular Mechanisms for Uridine Specificity and RNA-  
798 ATP Coupling. *Mol Cell*. 2015;60(3):487-99.



- 799 19. Dhote V, Sweeney TR, Kim N, Hellen CU, Pestova TV. Roles of individual domains in  
800 the function of DHX29, an essential factor required for translation of structured mammalian  
801 mRNAs. *Proc Natl Acad Sci U S A*. 2012;109(46):E3150-9.
- 802 20. Kelley LA, Mezulis S, Yates CM, Wass MN, Sternberg MJ. The Phyre2 web portal for  
803 protein modeling, prediction and analysis. *Nat Protoc*. 2015;10(6):845-58.
- 804 21. Jankowsky E. RNA helicases at work: binding and rearranging. *Trends in biochemical*  
805 *sciences*. 2011;36(1):19-29.
- 806 22. Hernandez A, Madina BR, Ro K, Wohlschlegel JA, Willard B, Kinter MT, et al. REH2  
807 RNA helicase in kinetoplastid mitochondria: ribonucleoprotein complexes and essential motifs  
808 for unwinding and guide RNA (gRNA) binding. *J Biol Chem*. 2010;285(2):1220-8.
- 809 23. Segal DJ, Crotty JW, Bhakta MS, Barbas CF, 3rd, Horton NC. Structure of Aart, a  
810 designed six-finger zinc finger peptide, bound to DNA. *J Mol Biol*. 2006;363(2):405-21.
- 811 24. Chen S, Xu Y, Zhang K, Wang X, Sun J, Gao G, et al. Structure of N-terminal domain of  
812 ZAP indicates how a zinc-finger protein recognizes complex RNA. *Nat Struct Mol Biol*.  
813 2012;19(4):430-5.
- 814 25. Klug A. The discovery of zinc fingers and their development for practical applications in  
815 gene regulation and genome manipulation. *Q Rev Biophys*. 2010;43(1):1-21.
- 816 26. Seiwert SD, Heidmann S, Stuart K. Direct visualization of uridylyate deletion in vitro  
817 suggests a mechanism for kinetoplastid RNA editing. *Cell*. 1996;84(6):831-41.
- 818 27. Rusche LN, Cruz-Reyes J, Piller KJ, Sollner-Webb B. Purification of a functional  
819 enzymatic editing complex from *Trypanosoma brucei* mitochondria. *EMBO J*. 1997;16(13):4069-  
820 81.
- 821 28. Izzo A, Regnard C, Morales V, Kremmer E, Becker PB. Structure-function analysis of the  
822 RNA helicase maleless. *Nucleic acids research*. 2008;36(3):950-62.
- 823 29. Masliah G, Barraud P, Allain FH. RNA recognition by double-stranded RNA binding  
824 domains: a matter of shape and sequence. *Cell Mol Life Sci*. 2013;70(11):1875-95.

- 825 30. Christian H, Hofele RV, Urlaub H, Ficner R. Insights into the activation of the helicase  
826 Prp43 by biochemical studies and structural mass spectrometry. *Nucleic acids research*.  
827 2014;42(2):1162-79.
- 828 31. Ye P, Liu S, Zhu Y, Chen G, Gao G. DEXH-Box protein DHX30 is required for optimal  
829 function of the zinc-finger antiviral protein. *Protein & cell*. 2010;1(10):956-64.
- 830 32. Guo X, Carroll JW, Macdonald MR, Goff SP, Gao G. The zinc finger antiviral protein  
831 directly binds to specific viral mRNAs through the CCCH zinc finger motifs. *J Virol*.  
832 2004;78(23):12781-7.
- 833 33. Kruse E, Voigt C, Leeder WM, Goringe HU. RNA helicases involved in U-  
834 insertion/deletion-type RNA editing. *Biochimica et biophysica acta*. 2013;1829(8):835-41.
- 835 34. Carnes J, Soares CZ, Wickham C, Stuart K. Endonuclease associations with three  
836 distinct editosomes in *Trypanosoma brucei*. *J Biol Chem*. 2011;286(22):19320-30.
- 837 35. McDermott SM, Luo J, Carnes J, Ranish JA, Stuart K. The Architecture of *Trypanosoma*  
838 *brucei* editosomes. *Proc Natl Acad Sci U S A*. 2016;113(42):E6476-E85.
- 839 36. Carnes J, McDermott S, Anupama A, Oliver BG, Sather DN, Stuart K. In vivo cleavage  
840 specificity of *Trypanosoma brucei* editosome endonucleases. *Nucleic acids research*.  
841 2017;45(8):4667-86.
- 842 37. Ammerman ML, Hashimi H, Novotna L, Cicova Z, McEvoy SM, Lukes J, et al. MRB3010  
843 is a core component of the MRB1 complex that facilitates an early step of the kinetoplastid RNA  
844 editing process. *RNA*. 2011;17(5):865-77.
- 845 38. Wirtz E, Leal S, Ochatt C, Cross GA. A tightly regulated inducible expression system for  
846 conditional gene knock-outs and dominant-negative genetics in *Trypanosoma brucei*. *Molecular*  
847 *and biochemical parasitology*. 1999;99(1):89-101.
- 848 39. Fisk JC, Ammerman ML, Presnyak V, Read LK. TbRGG2, an essential RNA editing  
849 accessory factor in two *Trypanosoma brucei* life cycle stages. *J Biol Chem*.  
850 2008;283(34):23016-25.

- 851 40. Hernandez A, Panigrahi A, Cifuentes-Rojas C, Sacharidou A, Stuart K, Cruz-Reyes J.  
852 Determinants for association and guide RNA-directed endonuclease cleavage by purified RNA  
853 editing complexes from *Trypanosoma brucei*. *J Mol Biol.* 2008;381(1):35-48.
- 854 41. Panigrahi AK, Schnauffer A, Ernst NL, Wang B, Carmean N, Salavati R, et al.  
855 Identification of novel components of *Trypanosoma brucei* editosomes. *RNA.* 2003;9(4):484-92.
- 856 42. Ammerman ML, Downey KM, Hashimi H, Fisk JC, Tomasello DL, Faktorova D, et al.  
857 Architecture of the trypanosome RNA editing accessory complex, MRB1. *Nucleic acids*  
858 *research.* 2012;40(12):5637-50.
- 859 43. Weng J, Aphasizheva I, Etheridge RD, Huang L, Wang X, Falick AM, et al. Guide RNA-  
860 binding complex from mitochondria of trypanosomatids. *Mol Cell.* 2008;32(2):198-209.
- 861 44. Sabatini R, Hajduk SL. RNA ligase and its involvement in guide RNA/mRNA chimera  
862 formation. Evidence for a cleavage-ligation mechanism of *Trypanosoma brucei* mRNA editing. *J*  
863 *Biol Chem.* 1995;270(13):7233-40.
- 864 45. Hashimi H, Zikova A, Panigrahi AK, Stuart KD, Lukes J. TbRGG1, an essential protein  
865 involved in kinetoplastid RNA metabolism that is associated with a novel multiprotein complex.  
866 *RNA.* 2008;14(5):970-80.
- 867 46. Harris ME, Hajduk SL. Kinetoplastid RNA editing: in vitro formation of cytochrome b  
868 gRNA-mRNA chimeras from synthetic substrate RNAs. *Cell.* 1992;68(6):1091-9.
- 869 47. Carnes J, Stuart KD. Uridine insertion/deletion editing activities. *Methods in enzymology.*  
870 2007;424:25-54.
- 871 48. Sievers F, Higgins DG. Clustal Omega, accurate alignment of very large numbers of  
872 sequences. *Methods Mol Biol.* 2014;1079:105-16.
- 873
- 874

## 875 Supporting information

876

### 877 **S1 Fig. Multi-sequence alignment of a C-terminal segment in *T. brucei* REH2 and**

878 ***Drosophila* MLE DExH/RHA RNA helicases.** The alignment was generated with Clustal

879 Omega (48). Boxes were inserted manually to improve the match between the MLE and REH2

880 residues. Note that H1032, K1033 and T1034 (in red), which make U-specific contacts in MLE,

881 are aligned with H1998, R1999 and T2000 (in red) in REH2.

882

### 883 **S2 Fig. Sedimentation analysis of endogenous editing proteins. (A)** 10-30% glycerol

884 gradients of freshly-made mitochondria-enriched extract from 29:13 procyclic trypanosomes.

885 Catalase and RECC complex were used as 11 S and 20 S markers, respectively (22).

886 Endogenous REH2, <sup>H2</sup>F1 and <sup>H2</sup>F2, GAP1 (GRBC2), GAP2 (GRBC1), and A2 (MP42) were

887 examined in western blots. All panels in this figure derived from the same extract fractions. The

888 data shown is representative of at least two panels for each protein in biological replicate

889 gradients.

890

### 891 **S3 Fig. RNase-resistant co-purification of tagged-<sup>H2</sup>F1 and endogenous <sup>H2</sup>F1.** Western

892 blots of IgG pulldowns from extracts with or without an RNaseA/T1 mix. All panels in this figure

893 derive from the same blot. The upper blot with the tagged-<sup>H2</sup>F1 bait was cut below the 75 kDa

894 marker. The middle and lower panels were divided between the 50 kDa and 37 kDa marker.

895 The 34.4 kDa RGG2, a typical subunit of the REMC module in the RESC complex. As expected,

896 the RNA-mediated association of RGG2 decreased with the RNase treatment.

897

### 898 **S4 Fig. Quantitation of steady-state RNA transcripts in the input mitochondrial extracts**

899 **used in the IgG pulldowns.** Independent biological replicates (two independent cultures used

900 in **Fig. 5**) with Cq average values and one standard deviation ( $\pm 1SD$ ,  $n=2$ ) were plotted. dCq

901 of steady-state RNA transcripts in lysates relative to background 18s rRNA used as reference  
902 [ $dCq = 2^{(\text{target } Cq - \text{ref } Cq)}$ ]. Shorter bars indicate a smaller differential versus 18s rRNA in the  
903 sample. For example, ND7 is relatively abundant compared to other transcripts in the sample  
904 (i.e., it has a lower Cq). The WT construct is induced or not (+/-). All mutants are induced. All  
905 end-point amplicons were examined in gels to confirm that they were single products during  
906 linear amplification.

907

908 **S1 Table. DNA oligonucleotides, gBlocks (IDT) and synthetic RNA.**

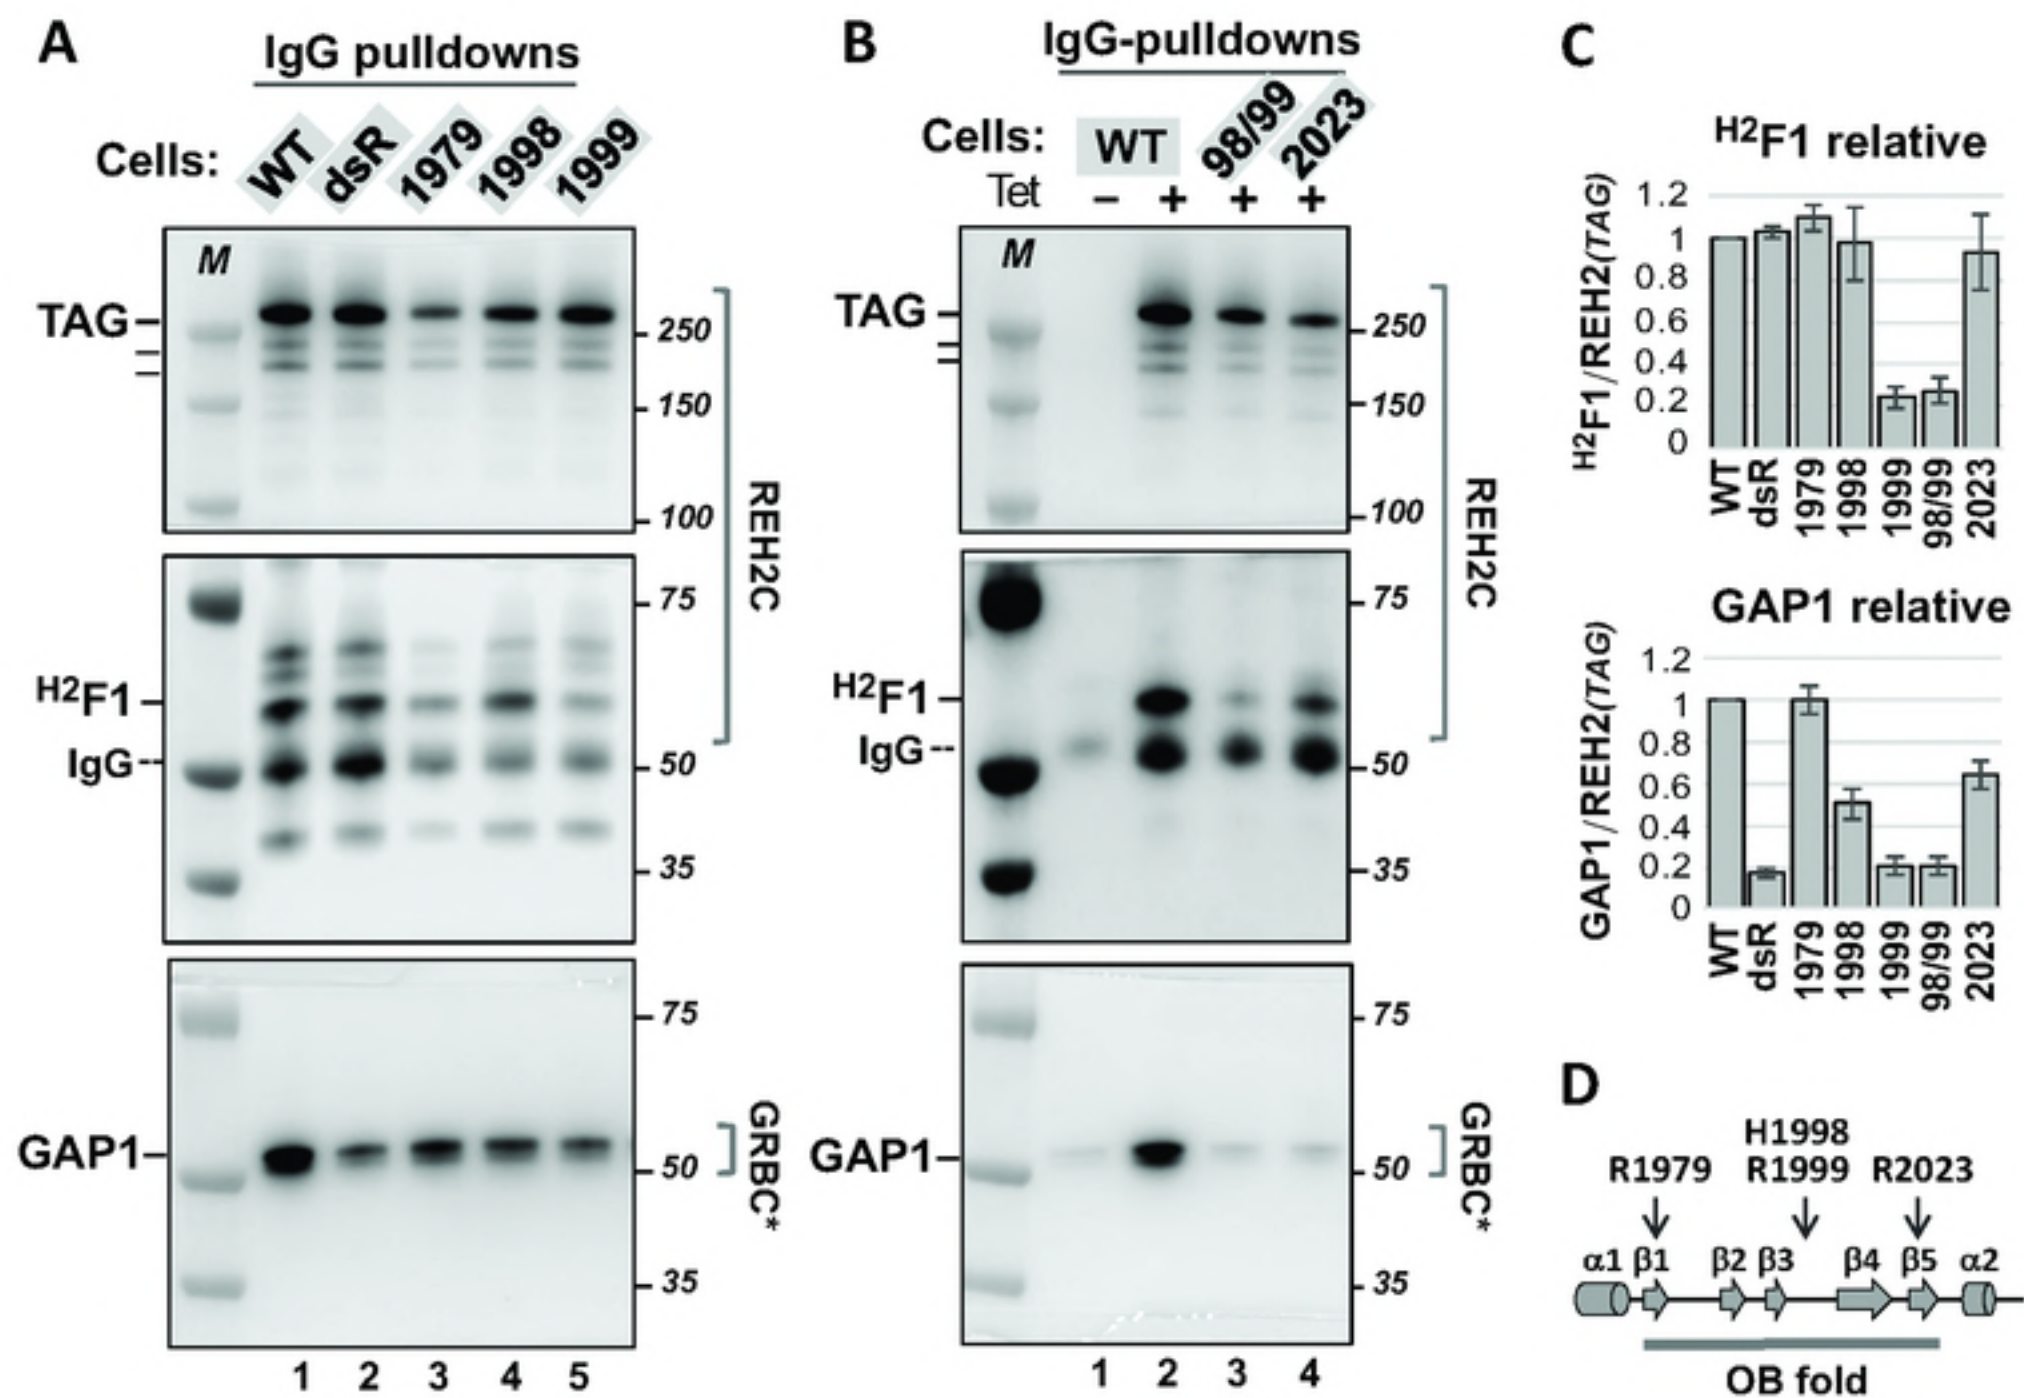

Figure 2

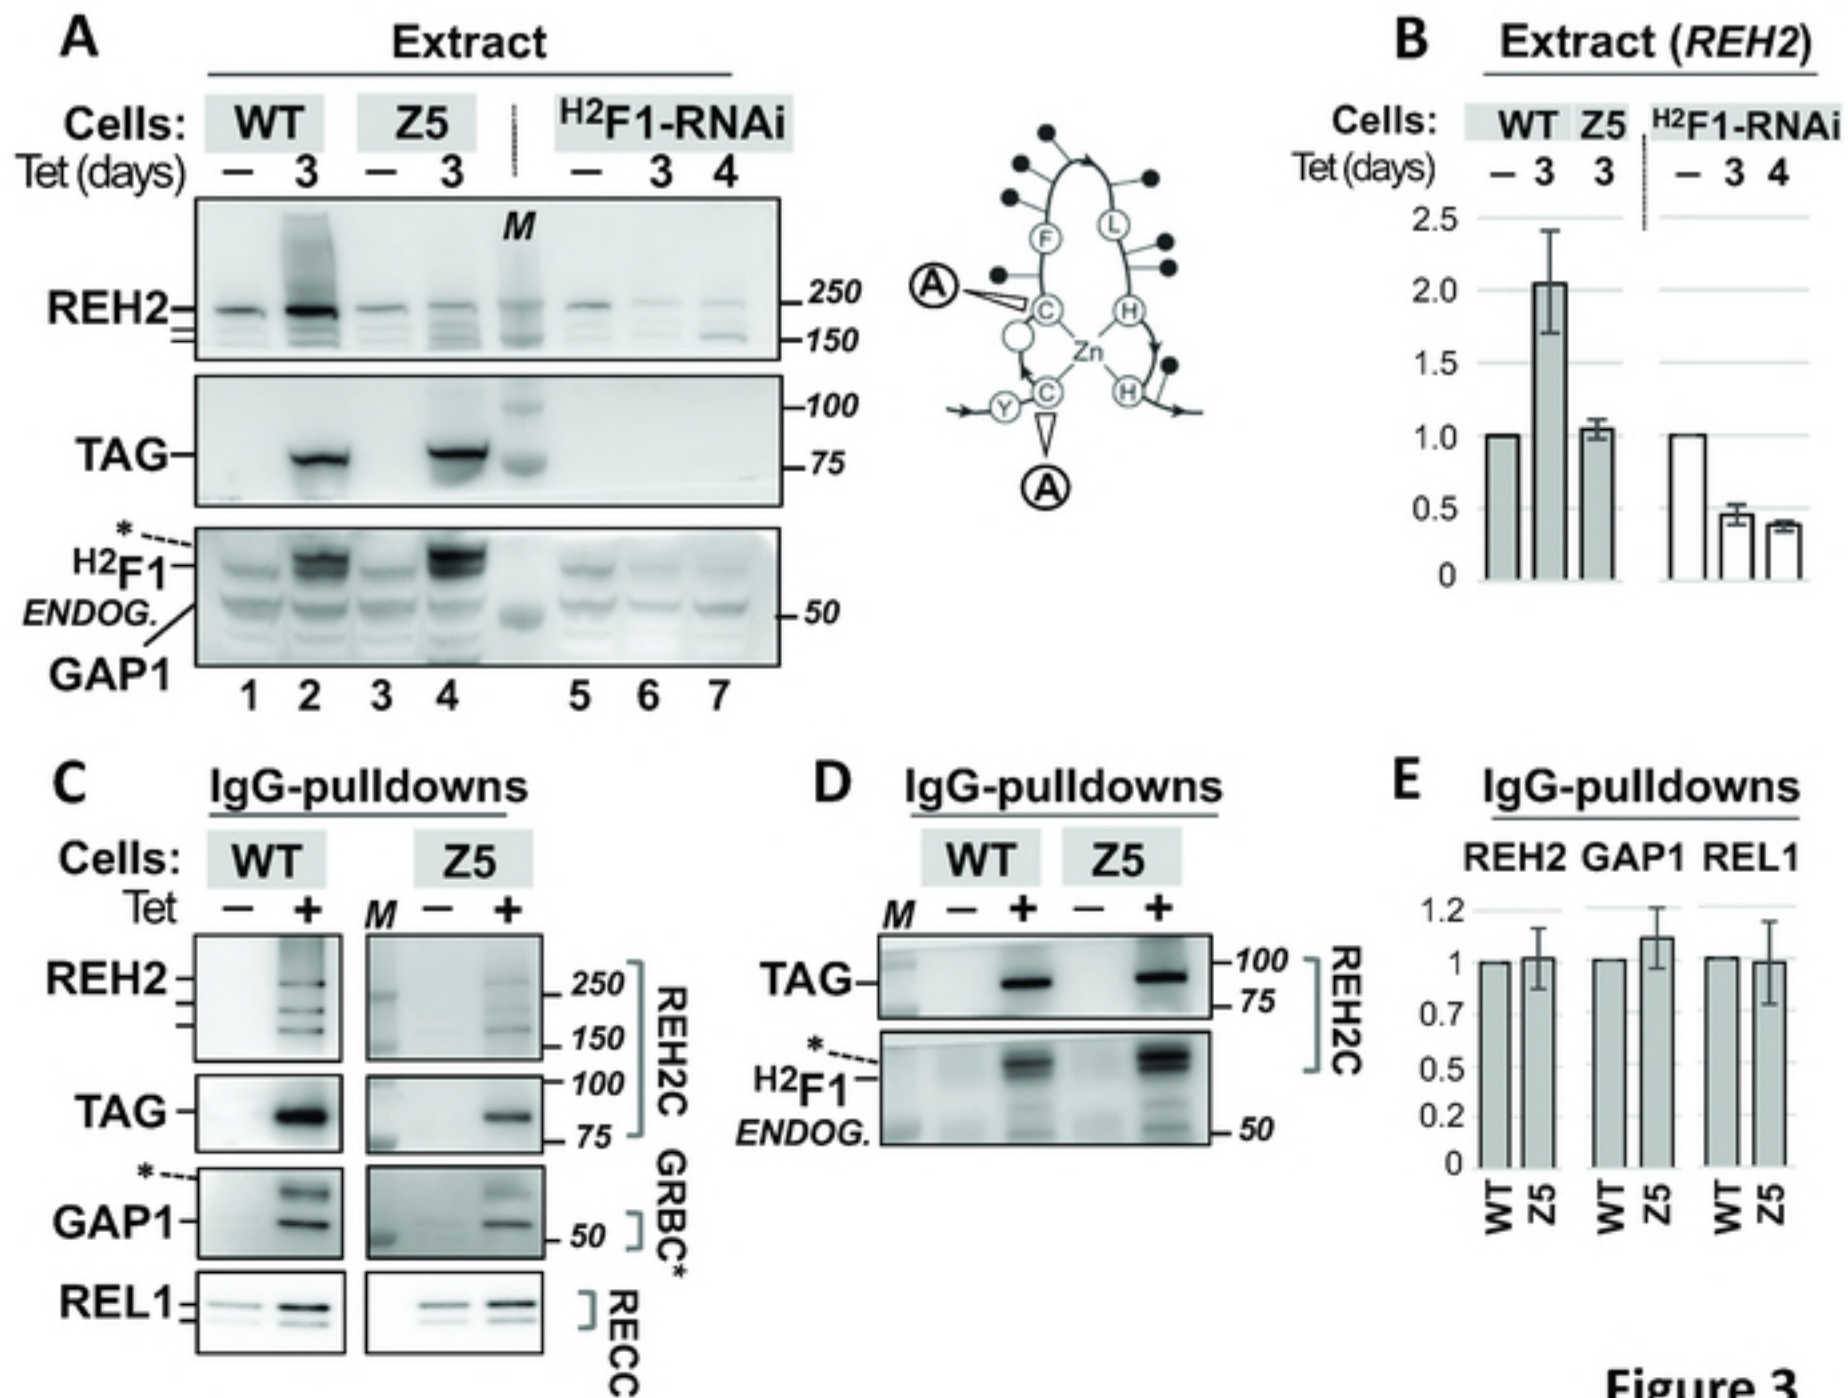

Figure 3

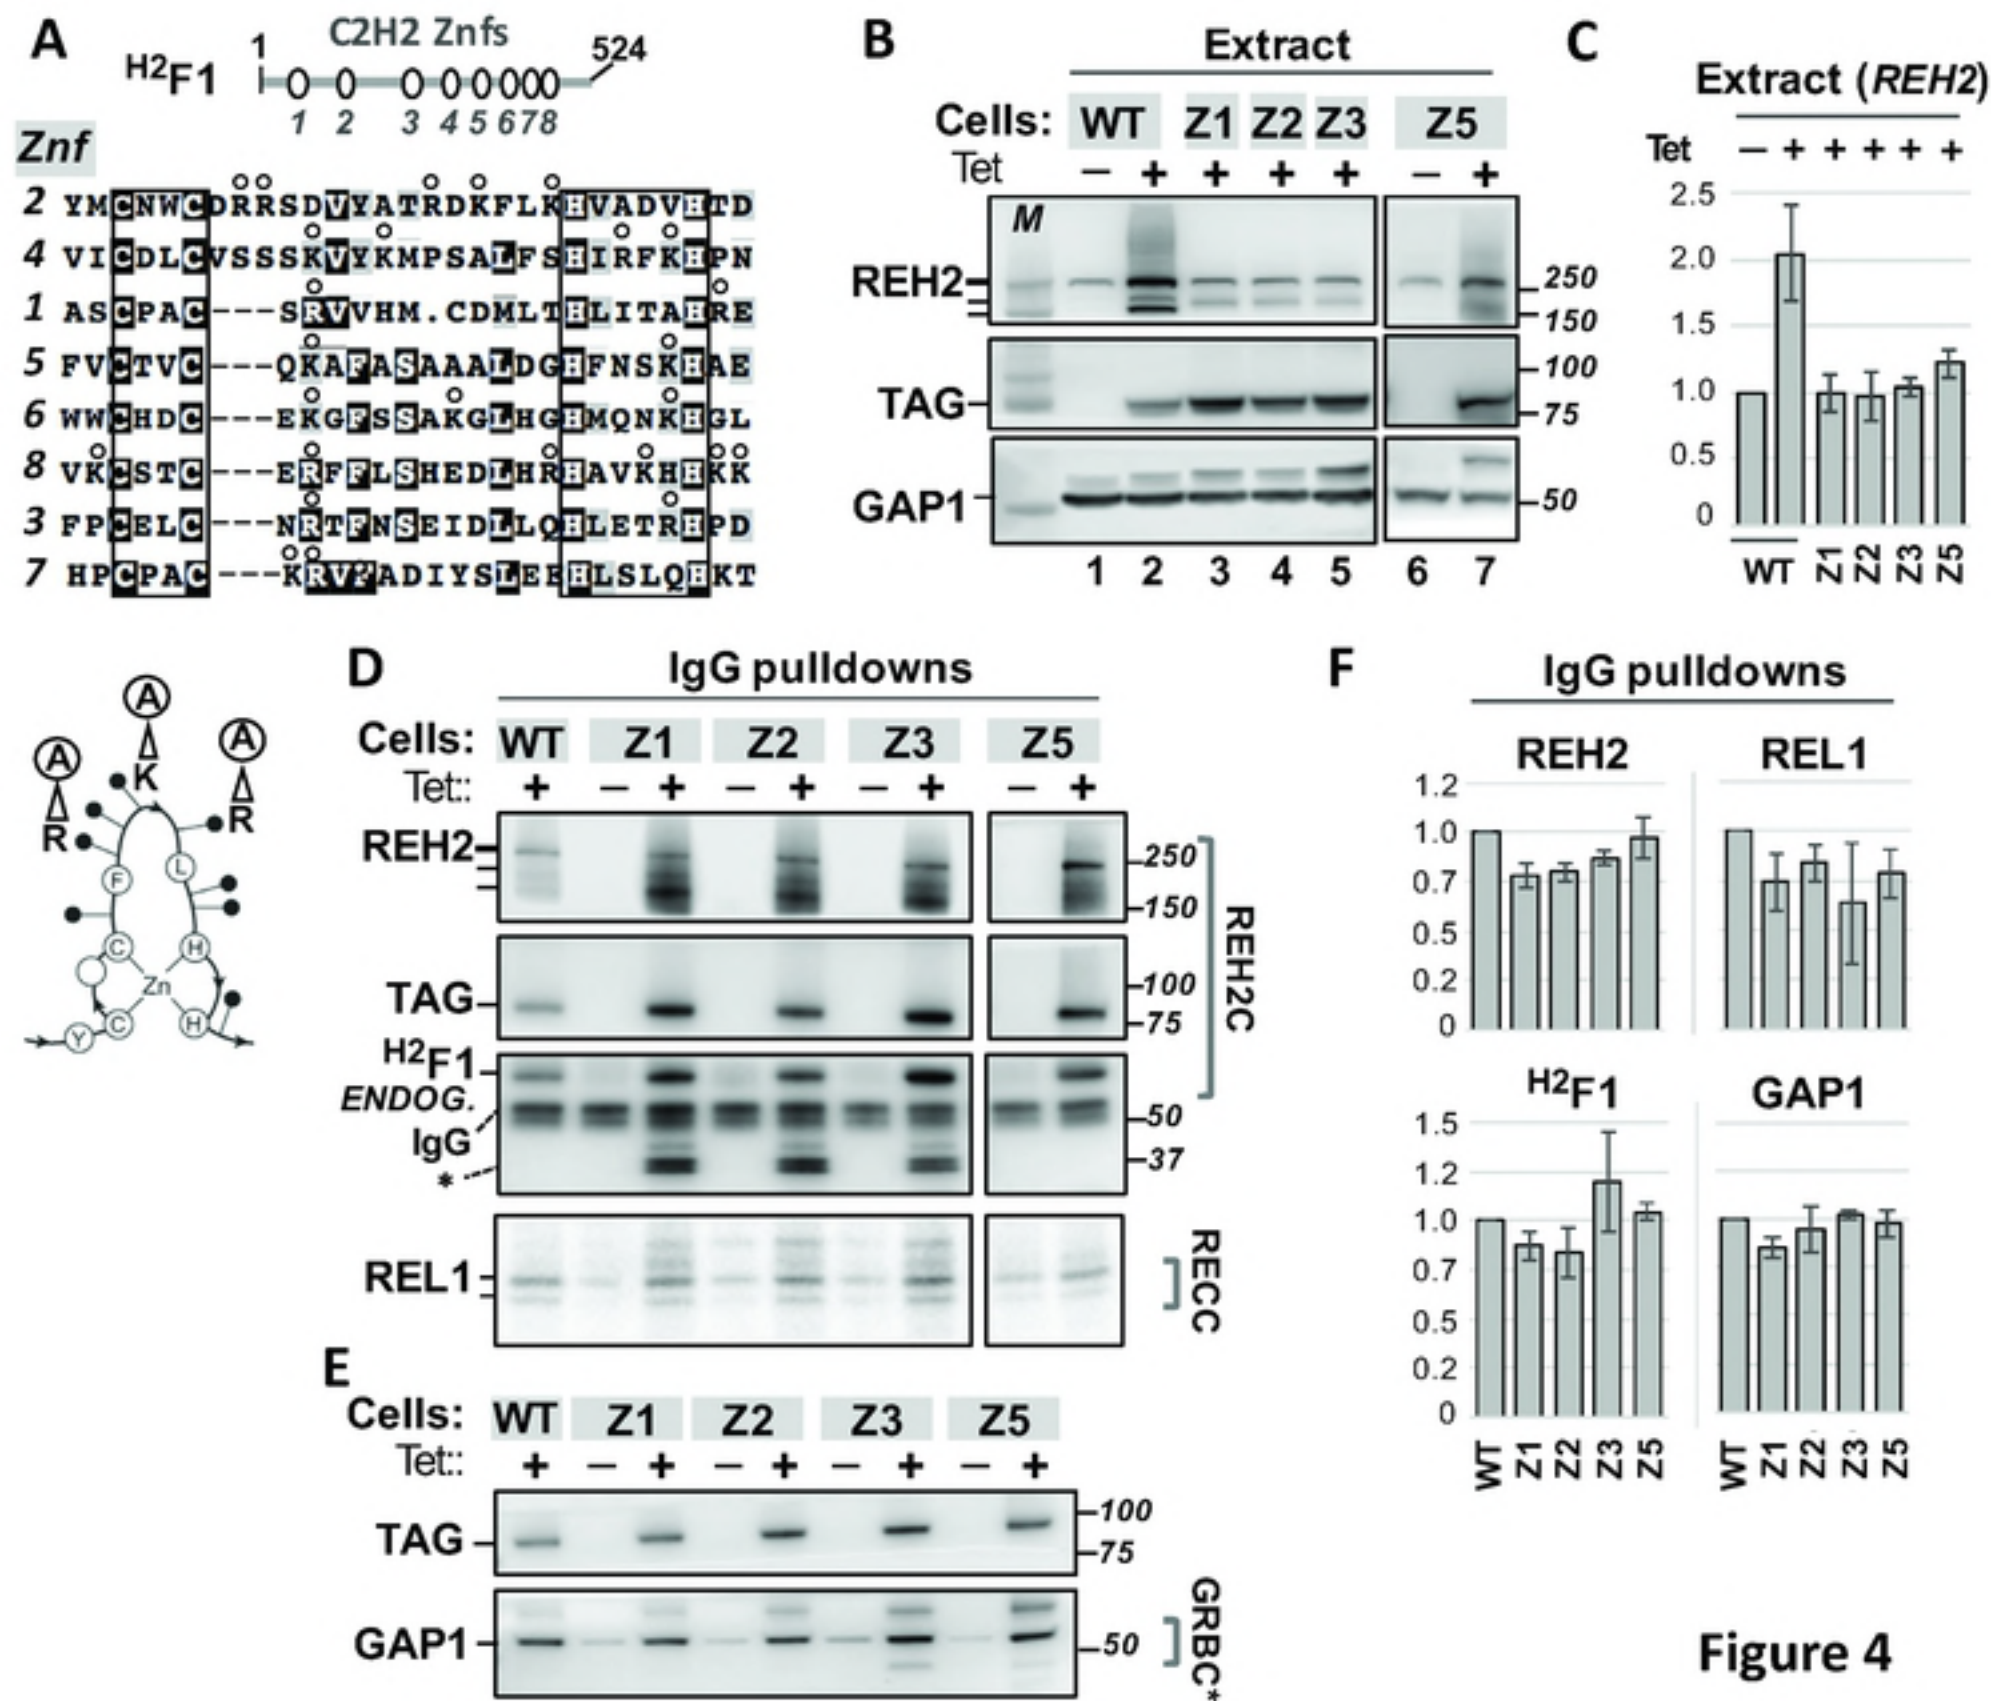

Figure 4

Figure 4



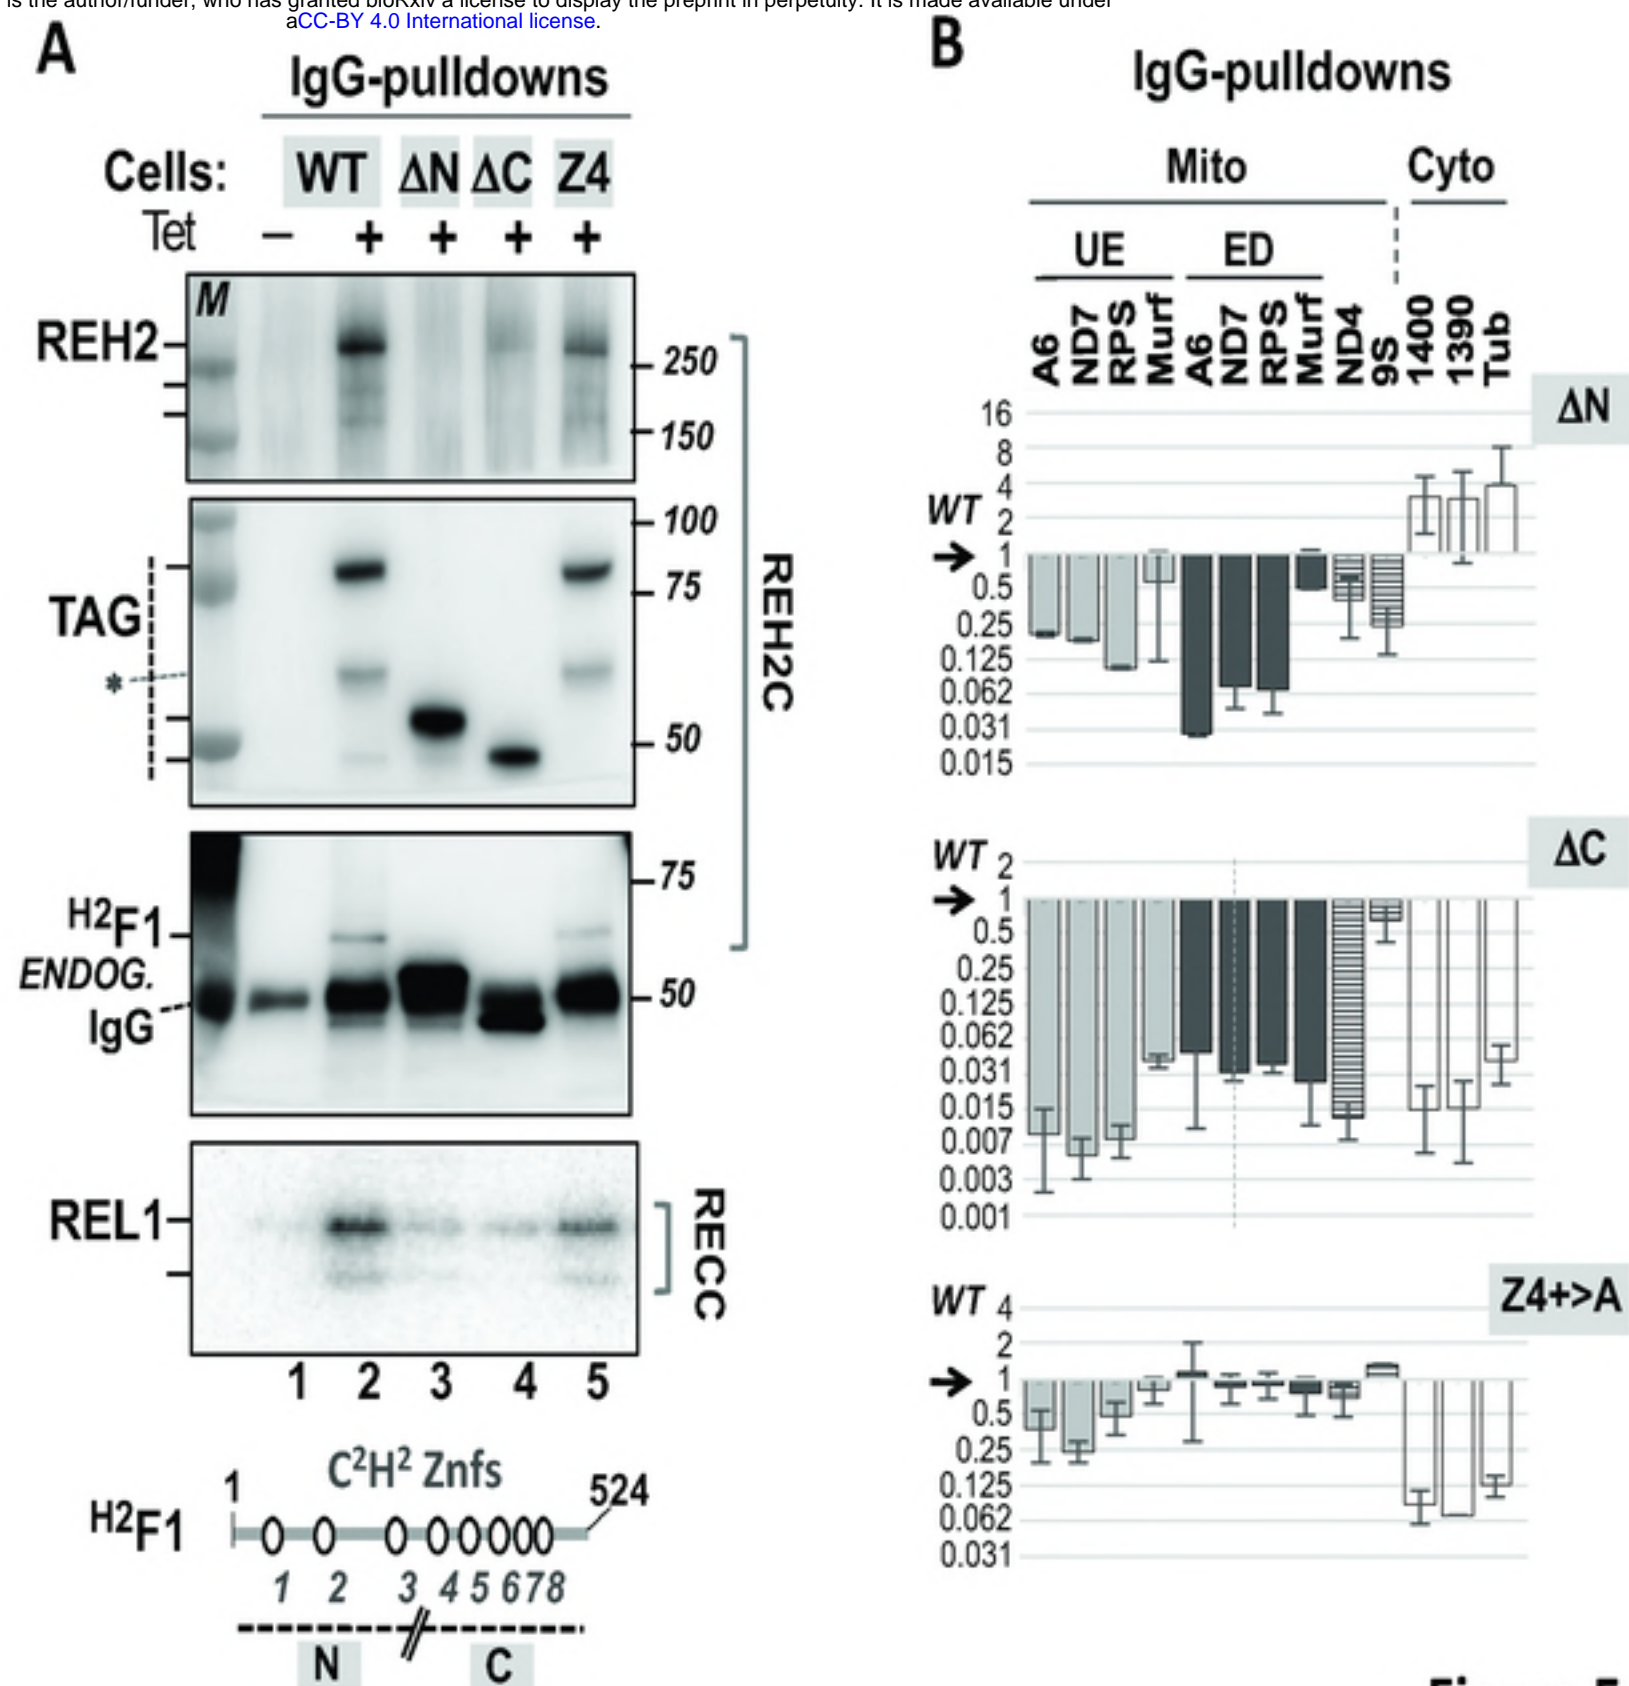

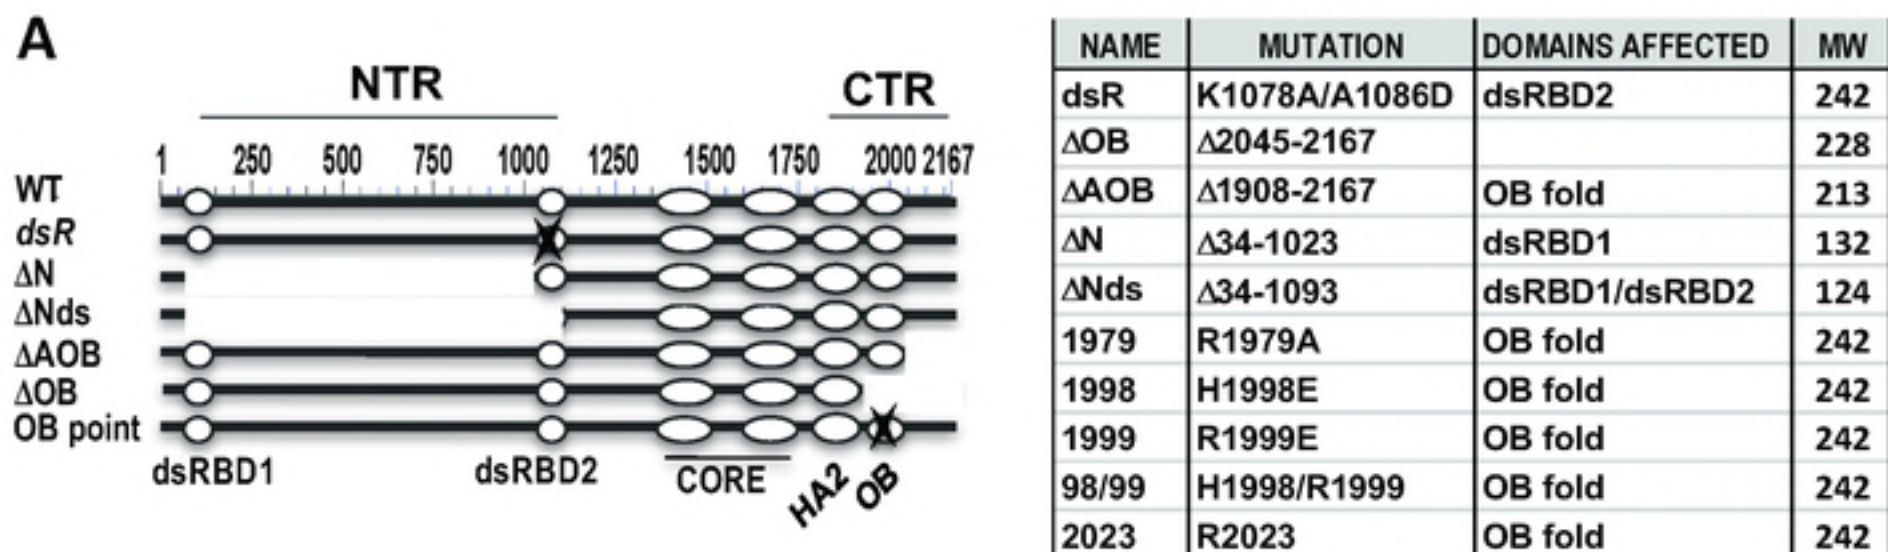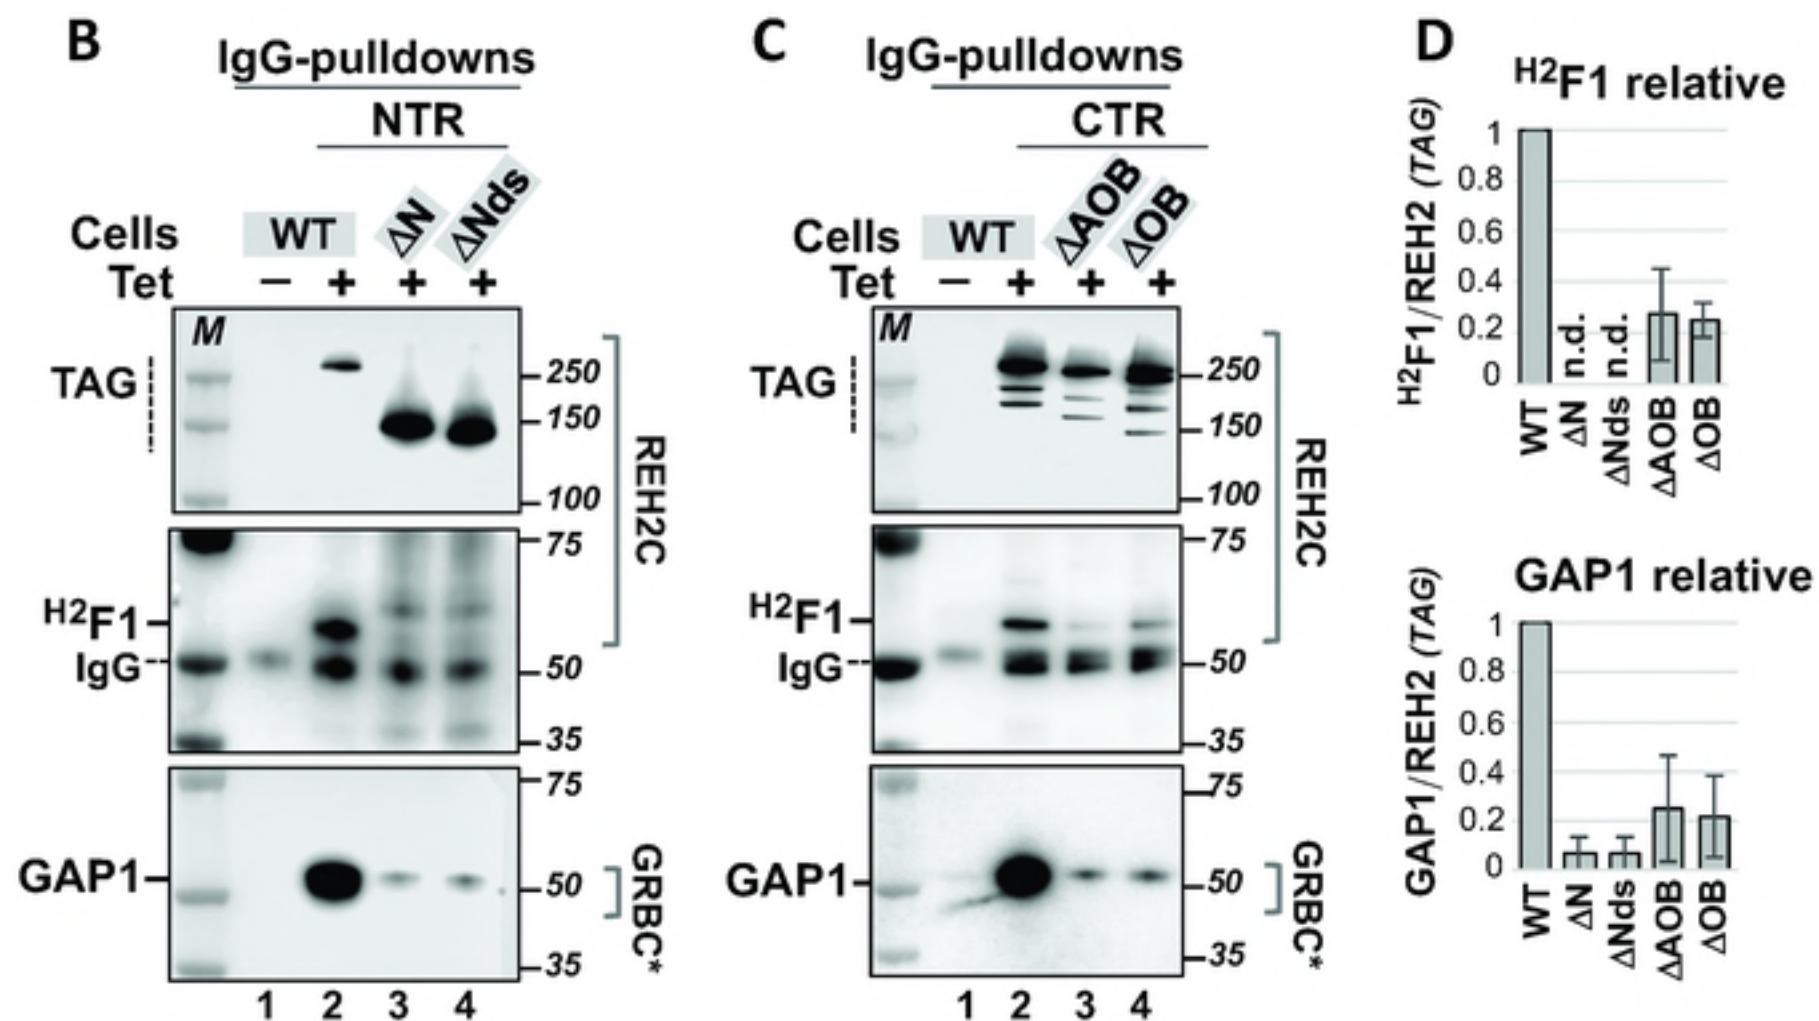

Figure 1

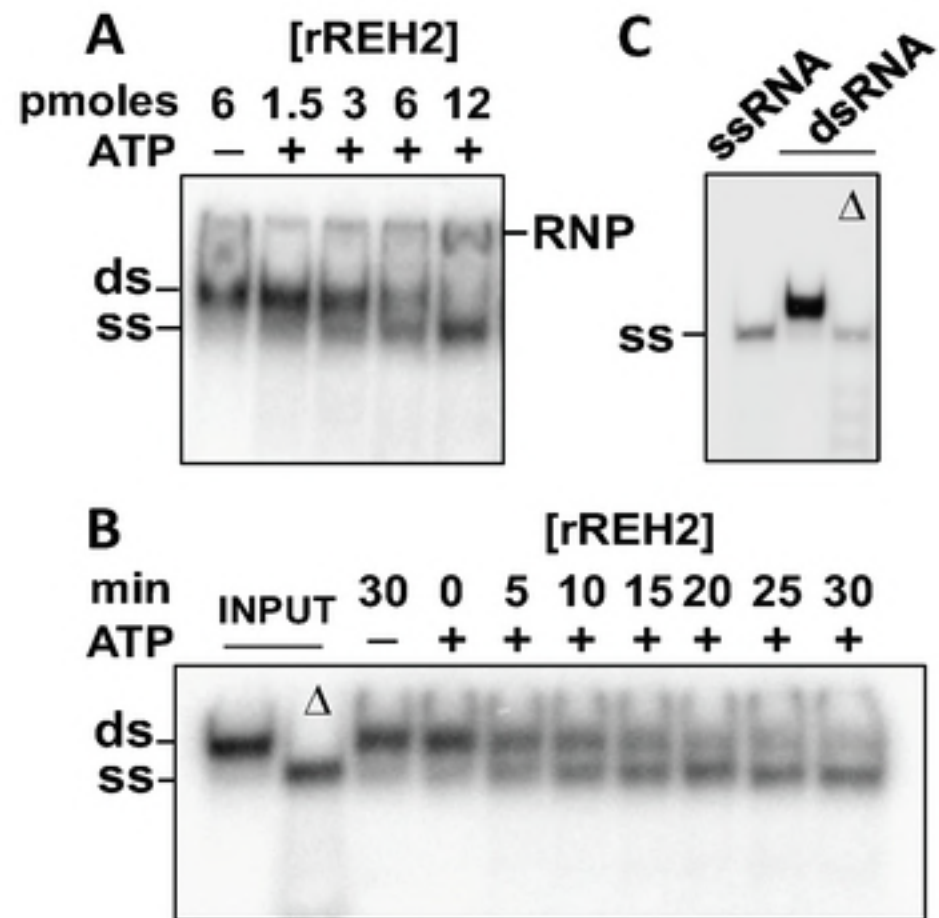

Figure 6
